# Supplementary material for: Understanding the needs and experiences of people with young onset dementia: a qualitative study
Source: PubMed Central journal article supplement — BMJ Open. 2018 Oct 21;8(10):e021166. doi: 10.1136/bmjopen-2017-021166 (PMC6196838; doi:10.1136/bmjopen-2017-021166), 2018-10-21
Supplement: bmjopen-2017-021166.draft_revisions.pdf [file bmjopen-2017-021166.draft_revisions.pdf]

# BMJ Open

BMJ Open is committed to open peer review. As part of this commitment we make the peer review history of every article we publish publicly available.

When an article is published we post the peer reviewers' comments and the authors' responses online. We also post the versions of the paper that were used during peer review. These are the versions that the peer review comments apply to.

The versions of the paper that follow are the versions that were submitted during the peer review process. They are not the versions of record or the final published versions. They should not be cited or distributed as the published version of this manuscript.

BMJ Open is an open access journal and the full, final, typeset and author-corrected version of record of the manuscript is available on our site with no access controls, subscription charges or pay-per-view fees (<http://bmjopen.bmj.com>).

If you have any questions on BMJ Open's open peer review process please email [info.bmjopen@bmj.com](mailto:info.bmjopen@bmj.com)

# BMJ Open

## Understanding the needs and experiences of people with young onset dementia: a qualitative study

|                               |                                                                                                                                                                                                                                                                                                                                                                                                                                                                                                           |
|-------------------------------|-----------------------------------------------------------------------------------------------------------------------------------------------------------------------------------------------------------------------------------------------------------------------------------------------------------------------------------------------------------------------------------------------------------------------------------------------------------------------------------------------------------|
| Journal:                      | <i>BMJ Open</i>                                                                                                                                                                                                                                                                                                                                                                                                                                                                                           |
| Manuscript ID                 | bmjopen-2017-021166                                                                                                                                                                                                                                                                                                                                                                                                                                                                                       |
| Article Type:                 | Research                                                                                                                                                                                                                                                                                                                                                                                                                                                                                                  |
| Date Submitted by the Author: | 15-Dec-2017                                                                                                                                                                                                                                                                                                                                                                                                                                                                                               |
| Complete List of Authors:     | Rabanal , Luisa ; University of Salford, Institute for Dementia, School of Health and Society<br>Chatwin, John; University of Salford, Institute for Dementia, School of Health and Society<br>Walker, Andy ; University of Salford, Institute for Dementia, School of Health and Society<br>O'Sullivan, Maria O'Sullivan; University of Salford, Institute for Dementia, School of Health and Society<br>Williamson, Tracey; University of Salford, Institute for Dementia, School of Health and Society |
| Keywords:                     | Young onset dementia, Dementia < NEUROLOGY, Health policy < HEALTH SERVICES ADMINISTRATION & MANAGEMENT                                                                                                                                                                                                                                                                                                                                                                                                   |
|                               |                                                                                                                                                                                                                                                                                                                                                                                                                                                                                                           |

SCHOLARONE™  
Manuscripts

# Understanding the needs and experiences of people with young onset dementia: a qualitative study

**Miss Luisa I. Rabanal**

Salford Institute for Dementia,  
School of Health and Society  
University of Salford, UK

**Dr John Chatwin**

\*Corresponding author

Salford Institute for Dementia,  
School of Health and Society  
Room 115, Crescent House  
University of Salford, UK  
[j.r.chatwin@salford.ac.uk](mailto:j.r.chatwin@salford.ac.uk)  
Tel: +44(0)7796 425035  
Fax: +44(0)161 295 5000

**Mr Andy Walker**

Salford Institute for Dementia,  
School of Health and Society  
University of Salford, UK

**Dr Maria O'Sullivan**

Salford Institute for Dementia,  
School of Health and Society  
University of Salford, UK

**Dr Tracey Williamson**

Salford Institute for Dementia,  
School of Health and Society  
University of Salford, UK

**Key words:**

Young onset Dementia; Dementia; qualitative methods; IPA; carers

**Word count:** 4660

## ABSTRACT

### Aim

Despite over 40,000 people diagnosed with young onset dementia (YOD) in the UK, there is a general lack of awareness of the condition when compared with late onset dementia (LOD). The aim of this study was to explore the experiences and needs of people living with young onset dementia (under 65 years), and gain an understanding of the issues that impact on them.

### Setting

Participants' homes, support group premises or university rooms.

### Participants

14 people with a diagnosis of YOD from a Northern UK city.

### Design

Semi-structured, in-depth interviews were audio recorded, transcribed and analysed cross-sectionally following principles of interpretative phenomenological analysis.

### Results

Three superordinate themes are reported on: 'process of diagnosis', 'the impact of living with young onset dementia' and 'needs of people with young onset dementia'. Nine subordinate themes captured participant experiences of developing cognitive difficulties, being diagnosed with YOD, and subsequently living with the condition. Key issues emerging included: a lack of general awareness of YOD; how this can delay help seeking; commonalities in pre-diagnosis trajectories; retrospective understanding of pre-diagnosis symptom patterns; the difficulties of obtaining a firm diagnosis; the importance of face-to-face support; difficulties associated with daily living. Participants also described the emotional and psychological impact of the condition and the importance of formal and informal support networks.

### Conclusions

People who have a diagnosis of YOD regard themselves as distinct from older people with dementia. Despite similar symptoms, the context in which they experience the condition creates a range of distinct psycho-social concerns not commonly well addressed by health and social care services. As awareness of YOD continues to grow, the development (or adaptation) of services which take into account the idiosyncratic needs of people with YOD should be addressed.

### Strengths and limitations of the study

- People with a diagnosis of YOD are a marginalised and under-represented patient group. Studies addressing their subjective needs are uncommon.
- The study provides insights into the experiences of people living with YOD and the process of engaging with health and social support networks.
- Care was taken to sample a cadre with as wide a range of characteristics as possible, including gender and socio-demographic variations.

- The sample was relatively small and participants were drawn from a single region.

## Background

There are 850,000 people living with dementia in the UK (1). The condition is increasingly recognised as a serious health and social challenge because it not only affects the person with the illness, but also directly impacts on their family, their carers and their wider social circle. (2) In the UK, tackling with dementia is high on the health policy agenda, and there have been a series of initiatives since the launch of the National Dementia Strategy, (3) aimed at raising awareness of the condition and improving the care available. (4,5,6,7) Similarly, the challenges encountered by those who care for people with dementia – either on a formal or informal basis – are increasingly acknowledged. (8) There have been a number of studies, (9,10,11) and policy initiatives (12,13) focusing on this particular group.

Although dementia is often associated with ageing, it not only affects older adults. There are currently over 40,000 people in the UK living with dementia who are under 65 years of age. (14) However, people with young onset dementia (YOD) (15) are largely absent from studies that have focused on the subjective experience of dementia and the development of services. Cases of undiagnosed YOD are very common, with reports as high as 30-50% (16) and again, may be attributed partly to the general perception that dementia is a condition of old age (17). Younger people who develop the condition are likely to present with a wider variety of symptoms compared to those over 65 years, (18) and this too can complicate matters. Memory loss and cognitive impairments which are strongly associated with dementia may not be the main presenting problem for a younger person, and the sometimes ill-defined symptoms that characterise the initial stages of the condition are often ascribed to other conditions such as depression or stress. (19,15) People with frontotemporal dementia, for example, can initially present with personality changes as their primary symptom, and younger people may also have difficulties with visuospatial and semantic tasks. (20) Another reason why people with YOD are currently viewed as a marginalised population may relate to the psycho-social limitations that the condition can impose. (21) This often includes social isolation, (22) and fears of stigma (20). As a result of this the likelihood that a person will become engaged in public activism or campaigning is low. (23)

For people who receive a diagnosis of dementia at a relatively young age (in their forties and fifties), the implications can be different from those who develop the condition in later years, beyond traditional retirement age. The implications can be particularly severe (24) with a person having YOD being more likely to still be in paid employment, and may have dependents including spouses, children and/or ageing parents to support. (15,22) Post-diagnosis, individuals can remain in relatively good physical health for many years, but the awareness of an inevitably accelerated mental deterioration, and the implications this will have, is in itself a source of great stress for both the person with the condition and those around them. (25) It can also be difficult for younger people to access appropriate community and residential services because mainstream dementia care services are aimed primarily at older adults and are often not suitable to their requirements. (26) Furthermore, services for younger people with dementia are often overlooked in mental health strategies which tend to default to the needs of older adults and they are frequently excluded from working age mental health services, reinforcing dementia as an older person's illness. (27)

1  
2  
3 The aim of this study was to explore the experiences and needs of younger people living with  
4 dementia – to facilitate an understanding of the issues that impact on them, and to identify  
5 opportunities for the development of services that might be a better ‘fit’ with the unique context of  
6 their needs.  
7  
8  
9

## 10 **Methods**

### 11 **Sample**

12  
13 Study participants were recruited from a number of YOD support organisations based in the North of  
14 England between February 2016 and April 2017. These included small independent organisations as  
15 well as larger groups affiliated to national agencies, including the NHS and the Alzheimer’s Society.  
16  
17  
18

19 The maximum diversity sample comprised 14 people with young onset dementia who all obtained  
20 their diagnosis before the age of 65 (see Table 1). Of these, five interviews were paired (person with  
21 dementia and their carer) but the carer voices are not reported on here.  
22  
23

### 24 **Interviews**

25 Interviews took place at a time and place convenient to participants, usually their home or community  
26 support group premises. Written informed consent to audiotape interviews was obtained. The  
27 research team developed an interview topic guide in partnership with members of a dedicated study  
28 advisory group which comprised twelve people who were either living with YOD (seven) or were the  
29 carers of people living with YOD (five). The interview guide was further revised through the study’s  
30 steering group which included representatives from service providing agencies, health practitioners  
31 specialising in dementia care, and members of the research team. Interviews were semi-structured,  
32 narrative driven and explored issues including: participants’ experiences of diagnosis; their trajectory  
33 of knowledge about the condition; use and experiences of statutory and non-statutory health and  
34 social care services; engagement with information resources and support organisations; and the  
35 impact of dementia on their daily lives. Interviews were conducted by LR and MO, elicited between 30  
36 and 120 minutes of audio-recording each and were fully transcribed by an external transcription  
37 company.  
38  
39  
40  
41

### 42 **Analysis**

43 In line with a growing number of other studies on the lived experience of dementia, interpretative  
44 phenomenological analysis (IPA) was applied. (28). IPA is an established method for researchers to  
45 explore the experience of individuals going through illness and the meanings people attach to those  
46 experiences. (29) IPA fosters the incorporation of individual perspectives, and the idiosyncratic  
47 meanings that participants attached to elements of their experience, which is particularly important  
48 given our limited knowledge of the experience of living with YOD. The relevance for using IPA with  
49 people with chronic illness has also been highlighted, as the approach accepts that participants are  
50 their own experts. (30) Analysis was undertaken by LR with independent verification of emergent  
51 themes with TW using a small subset of five transcripts.  
52  
53  
54  
55  
56  
57  
58  
59  
60

## Results

Fourteen people aged 57-67 years, with YOD were interviewed including eight women and six men. See Table 1. In-depth analysis of data from a sample of this size is fitting with IPA.

**Insert Table 1 about here**

### Emergent themes

IPA revealed four superordinate themes that represent prominent features of participants' stories collectively. The superordinate themes each comprise three subordinate themes (see Table 2) which vary in terms of their contribution from individual participants. In line with IPA philosophy, unique and common elements from the perspectives of participants are therefore represented. The more substantial superordinate Themes 1 to 3 are reported upon here: *the process of diagnosis; the impact of living with young onset dementia; and the needs of people with young onset dementia*. The less prominent theme 'living well with young onset dementia' is shown in Table 2 for completeness but not reported on.

**Insert Table 2 about here**

#### Superordinate Theme 1: *The process of diagnosis*

Participants talked extensively about how they received their diagnosis and the impact that this had on them, their families, and their wider social circle. The experience was characterised by a distinction between pre and post diagnostic phases. The pre-diagnosis phase was the period when the first subtle signs and changes in behaviour started to occur. It could be a particularly difficult and uncertain time for people who were still likely to be active, working and looking after dependents. It was usual for people who began to experience problems in carrying out their usual routines to battle to maintain control until a point of crisis forced them to seek help. The pre-diagnosis period was only really revealed and assimilated in hindsight, once a person could make retrospective connections between their gradually emerging symptoms – such as confusion and increasing memory problems – and their condition.

A lack of awareness relating to YOD was reported by participants in the pre-diagnosis phase. In some cases, this had delayed the point at which they sought help. The interviewees gave a number of examples of signs and symptoms that were experienced during the early stages of their condition, but as these could occur in isolation, and were not always to do with memory issues, they were not immediately seen as indicators of a single underlying condition.

I found that my concentration wasn't the same. I could be stood cooking something and I'd go away and then I'd forget, until the smoke alarm was going off. . . I was decorating the bathroom at the time, I'd got the first piece of paper up then I couldn't fathom out how to match and I thought oh this isn't right . . . I could plug in the vacuum cleaner but I didn't know how to turn it on. (Participant 3)

1  
2  
3  
4 I didn't think of it as an illness, I just thought I was having . . . but you know you just think  
5 the job is very stressful and you always have a, 'oh well, we were busy last night.'  
6 (Participant 4)  
7

8  
9 Even after people decided to seek help, it could be difficult to get a firm diagnosis, and there was often  
10 a reported struggle to be heard by health professionals:  
11

12 The doctors and consultants were saying, 'no, you're too young to have dementia'. At this  
13 time I was about 49. So their thinking was it could be depression or stress because I was still  
14 working at this point. (Participant 1)  
15

16  
17 [Speaking about her GP] She put me on some tablet anyway, she said it was depression. . . I  
18 said to her, look it's getting that bad I'm looking after children, I can't do it. (Participant 3)  
19

20  
21 Participants had mixed views on the actual process of receiving a diagnosis. As with the process of  
22 being told about any life changing illness, interpersonal issues relating to the communication  
23 awareness and empathy of health care practitioners was important on an individual level. However,  
24 regardless of how the news was delivered, and the psychosocial support that may have been available,  
25 there was unanimity over the shock of actually receiving a diagnosis:  
26

27  
28 . . . and then they proceeded to tell me that I had Alzheimer's. At which point I just froze  
29 completely. (Participant 1)  
30

31 [They said] it's early onset Alzheimer's disease, just out of the blue like that. Well I was  
32 numb. (Participant 3)  
33

34 . . . it was awful. I felt like I was hit by a sledgehammer. . . I felt as though somebody had  
35 pulled the plug out of everything. (Participant 5)  
36  
37

38  
39 At a practical level, a recurring issue was the amount of supporting documentation and information  
40 that participants were given at the point of diagnosis, and how this could be overwhelming.  
41

42 . . . and you're bombarded with, take this, take that, take this, take that. All these leaflets  
43 and basically all you want to do is sit down and think it through yourselves. (Participant 9)  
44

45  
46 I was given a pile of documents and I went home and put them in a cupboard. I have spoken  
47 to a number of people and it is a shared experience. It's all just too much to take on board  
48 and really, just a page would have done to point out the services. (Participant 10)  
49

50  
51 The predominance of leaflets as opposed to face-to-face support was also highlighted:  
52

53 When I got home I was so angry, all the leaflets went straight in the bin. That was my way of  
54 thinking, I don't need the bloody leaflets, they don't mean anything to me. . . so yeah,  
55 leaflets weren't I mean for me. The thing that would have helped me most would've been for  
56  
57



1  
2  
3 someone to be around outside my consultation room and approach me. Not approach my  
4 husband, but approach me maybe. I don't know, maybe offered me somewhere on my own  
5 rather than me going out in a big black cloud into nothingness. (Participant 1)  
6

7  
8 Some participants felt that post-diagnosis support was lacking. One acknowledged that she was coping  
9 with the help of her husband, but would have appreciated an occasional offer of support:

10  
11 . . . maybe every six to twelve months to say, 'we're here!' Particularly some emotional  
12 support. So I'd like somebody, not to take it out on, you know, somebody to talk to.  
13 (Participant 9)  
14

15  
16 A similar lack of agency was acknowledged by another participant:

17  
18 Nobody says, you know, 'how does that make you feel?' In my view there still isn't any  
19 opportunity, three years down the line and I still haven't been able to voice how it made me  
20 feel then, how I felt coping with it for the last couple of years and how my feelings are  
21 towards the future. (Participant 1)  
22  
23

## 24 25 Superordinate Theme 2: *The impact of living with YOD*

26  
27 The impact that dementia had on participants are grouped here into two main areas: *changes in*  
28 *function and daily living*, and *emotional and psychological impact*.  
29

### 30 31 *Changes in function and daily living*

32 The impacts on function were wide-ranging. Again, this was not always the direct result of memory  
33 loss per se. For example, participants described problems with everyday activities such as dealing  
34 with money:  
35

36  
37 I can't count money; I haven't yet worked that one out. (Participant 2)  
38

39  
40 Sometimes I don't carry money anymore because I could fumble with it. When I used to go  
41 and pay, I couldn't count the change out. (Participant 3)  
42

43  
44 I was going to the bank, put my card in to get some money out, and I took the card out and  
45 left the money. (Participant 7)  
46

47  
48 I would, for example, go for my lunch or go into a shop and if they said that something was  
49 35 pence and I took the change out of my pocket, I couldn't count it. (Participant 10)  
50

51 Communication issues, including the inability to maintain concentration during conversations and  
52 losing the thread during interaction were highlighted. Frequently reported was an increasing difficulty  
53 in 'finding the right word', and other more individualistic effects such as difficulty in recognising faces,  
54 pronunciation and speech production. There were less obvious problems too, such as only being able  
55 to concentrate on thinking about one thing at a time, which could have a broad impact on many  
56  
57

1  
2  
3 aspects of daily life. Participants 4, 12 and 13, described noticing themselves becoming  
4 uncharacteristically confused and forgetful at work:  
5

6 Well in my job [nursing] I was forgetting a lot of things, which I hadn't done before. I was a  
7 perfectionist in my job and I was then forgetting, not forgetting how to do things but – yes, I  
8 suppose, in a way. What was happening was I was forgetting parts of what I was doing. . .  
9 One night I came back and they said, 'oh, how was such and such a body?' And I went, 'oh, I  
10 can't remember what I gave him.' So they were all going round and asking was it this? Was it  
11 that? And we have got like 12 of us in the office and they are all shouting out 'oh, is it this or  
12 is it that?' And then all of a sudden somebody said the word and I went 'Yes! That's what I've  
13 done, that's it' And I got a round of applause. . . (Participant 4)  
14  
15

16  
17 And actually, I think that was the time when I really thought, maybe I have got something.  
18 But I wrote the bloody thing and I couldn't remember it. (Participant 12)  
19

20  
21 I absolutely loved my job and then it just, I started, I realised that it was, I would come in the  
22 following day and couldn't remember what I'd worked on the night before. (Participant 13)  
23

#### 24 *Emotional and psychological impact*

25 Participants described their struggles and fears around living with dementia. These included  
26 uncertainty for the future and concerns about putting themselves at risk while struggling to maintain  
27 an image of themselves as 'normal' members of the community. A sense of trying to cover things up,  
28 and keep the realities of the condition hidden was evident:  
29

30  
31 I cover up a lot. . . If I'm in a doctor's surgery I will get a magazine and flip through it. I can  
32 read the words but it doesn't make sense what's there. I don't understand what I'm reading  
33 but I wouldn't give people the satisfaction of thinking. . . To them they probably just think I'm  
34 reading. So really you mask a lot of things just to try and still fit in with society so you're not,  
35 like, different. (Participant 3)  
36  
37

38  
39 You know you sort of live a double life almost. You know, you're sort of, 'yeah I'm fine, I'm  
40 fine.' But underneath you're thinking well am I going to see my grandkids grow up?  
41 (Participant 1)  
42

43 The importance of work, not only as a source of income but also of identity, was highlighted by  
44 participants. Also what was striking was the deep sense of loss that could occur when people  
45 were forced to stop working because of their cognitive difficulties – even if YOD had not yet been  
46 formally diagnosed. Eight of the interviewees with YOD were in paid employment at the time of  
47 their diagnosis.  
48

49  
50 I had to give up work and that was devastating, being a carer. When I realised that my clients  
51 were in danger, I thought I can't carry on with my job. (Participant 1)  
52  
53  
54  
55  
56  
57  
58  
59  
60

1  
2  
3 [In a hospital] you see, if you are making a mistake, somebody is going to get hurt. That was  
4 the problem. That's why, when I went to see them, they told me I couldn't work anymore.  
5 (Participant 4)  
6

7  
8 Superordinate Theme 3: *The needs of people with young onset dementia*  
9

10 The majority of participants felt that the support of their family, friends and other people living with  
11 dementia was crucial. Those who did not have spouses often had a key person, possibly a close friend  
12 or child, who provided emotional and practical support:  
13

14 [Talking about her daughter] She has gone through a lot with me in the last 12 months. . .  
15 and we have good communication, she can read me, she knows when I walk through that  
16 door in the morning, she knows if it's a good or bad day. (Participant 6)  
17  
18

19 Dementia-specific community groups were also seen as a significant source of support, and the  
20 importance of being able to relate to other people who had been, or were currently going through, a  
21 similar experience was highlighted:  
22

23 . . . because there is nothing like having somebody who has got the same problem telling  
24 you how to cope with it, you know. Because you have been there, you have done it and you  
25 have got the t-shirt. I found [name of a high-profile UK dementia activist] was the best  
26 ambassador for it, because I looked at him and I thought, that's how I want to be in seven  
27 or eight years. (Participant 4)  
28  
29  
30

31 I find that I am getting more support through people from the groups. (Participant 8)  
32  
33

34 However, participants reported that it was important for the support they were offered to take into  
35 account that they may have different needs and interests to older people with dementia. Support  
36 groups that were specifically organised for people with YOD, rather than dementia in general were  
37 praised because they offered age-appropriate activities and – at their best – helped to develop a sense  
38 of independence and empowerment.  
39  
40

41 I think people of my own age, if they set up a group for them. Because we are probably a bit  
42 more able minded to do things, our faculties are probably a little bit better than maybe the  
43 older ones are. . . because everything at the moment is based on older people. . .it's like  
44 being in school and it's all old war songs. Well I wasn't even born in the war. (Participant 3)  
45  
46

47 There was also a strong sense that any new initiatives need to acknowledge that not everybody will  
48 wish to engage with 'traditional' dementia support group formats – singing groups, reminiscence  
49 groups and so on. Again, this was largely because of the perception that these groups catered mainly  
50 for older people. Participants, who were still living independently, expressed a need for a less formal  
51 approach in how dementia group sessions were booked and arranged:  
52  
53

54 [If] you have a singing group for dementia, why do I have to make an appointment? Surely I  
55 should be able to just walk through the door and go 'hello, I am such a body, I've got young  
56  
57  
58

1  
2  
3 onset dementia, can I see what you're about please?' I shouldn't have to phone up and  
4 have to book in. . . It's the way they run their groups, this phone up and book in. Sorry, but  
5 how can anyone with dementia, unless they've got a carer, remember to phone up and  
6 book a spot? (Participant 6)  
7  
8  
9

## 10 Discussion

11 Participants described in detail their particular experiences of receiving a diagnosis of dementia at a  
12 relatively young age, and coming to terms with the situation they found themselves in. Currently,  
13 although medical and lay awareness about dementia issues in general is on the ascendant, (31) and  
14 the idiosyncratic collection of psycho-social issues that it engenders, remain at the margins of public  
15 awareness. (32) People who are formally diagnosed can find themselves in a position where, for the  
16 purposes of many health and social support interventions, their needs are aggregated with those of  
17 people who develop dementia much later in life. On one level this may not appear to be a significant  
18 issue; functionally, the symptoms exhibited by both cohorts will be similar, and so too will be the  
19 choice of treatments and therapies available. (33) For many people with YOD, however, there are likely  
20 to be a whole raft of tangential - often age related - psycho-social issues, such as still being in  
21 employment or in a spousal relationship, that have a profound impact on the way in which they come  
22 to terms with their condition and whether or not they develop effective ways of living with it.  
23  
24  
25  
26

27 The findings from this study concur with other work which has highlighted that people with YOD face a  
28 range of specific difficulties that do not necessarily impact on older people to the same degree. (34,35)  
29 The often lengthy period leading up to the point at which a person recognises that they need to seek  
30 help is the first of these. In line with other studies, (36,37) for a number of our participants, the initial  
31 signs that something was wrong were not directly related to memory problems, but to wider and more  
32 general cognitive anomalies or behavioural changes, with eight participants first noticing problems  
33 whilst at work. Basic memory issues such as increasing forgetfulness could be a significant element,  
34 but might well only have been one of a variety of sporadic perturbations in spatial awareness or  
35 episodes of general confusion. Again, with an older person, the onset of such symptoms might readily  
36 indicate the onset of dementia. But with younger people, connections are often not made until much  
37 further on in the disease process. (38) In line with studies on self-identity and illness, (39,40) people  
38 may attribute these kinds of symptomatic patterns to work stress or other causes such as depression.  
39  
40  
41  
42 (41)  
43

44 Although, as we have outlined, there have been significant positive developments at both a national  
45 and local level in the re-positioning of care pathways and social support for people with dementia,  
46 (5,6) it was evident that the process of receiving and accepting a diagnosis of YOD was extremely  
47 difficult for most people. At an interactional level there have been few recommendations relating to  
48 how health professionals might better adapt their approach to delivering a diagnosis – one that might,  
49 for example, more readily take into account the perspective of the younger person. Furthermore,  
50 although there have been significant improvements in the provision of relevant health and support  
51 information in recent years, (24) this in itself appears to be causing some problems, not least that the  
52 major part of it is still skewed towards older patients and their carers. As has been suggested in studies  
53 on information provision for other serious conditions (42,43) people in this study reported feeling  
54 overwhelmed at the point of diagnosis by the sheer amount of material they were given, to the point  
55  
56  
57  
58  
59  
60

1  
2  
3 where they simply disengaged with it. For a condition that can place such restrictions on cognitive  
4 processes, more effective and streamlined ways of delivering information tailored specifically for those  
5 with YOD need to be devised.  
6

7  
8 Unlike those who develop dementia after they reach traditional retirement age, people with YOD will  
9 commonly be in employment or eligible for employment at diagnosis. Having to give up work or the  
10 prospect of preferred work, and the severe implications this has on many levels, was a recurring  
11 theme. Ironically, still being engaged in a work environment and being in a position where subtle  
12 changes in behaviour and cognitive ability might be more readily noticed – both by the person  
13 themselves and also by their co-workers – could be a significant trigger in prompting people to seek  
14 help. Occasionally this decision may be forced upon them, particularly if they work in a field where  
15 their ability and actions could be a danger to others, such as healthcare, making the experience  
16 particularly difficult.  
17  
18

19  
20 Study participants were clear about the importance they placed on family, friends and peers (other  
21 people living with dementia) as a source of support, at both a psychological and practical level. The  
22 study suggests, however, that as with information provision and care pathway engagement, attitudes  
23 towards formal and informal support groups can be ambiguous. While efforts to provide such support  
24 were universally appreciated, there was a definite sense that the traditional forms of dementia  
25 focused support group do not always follow formats, or offer activities that younger people wish to  
26 engage with. More passive reminiscence based activities, for example, that are very common in care  
27 homes and other environments that support older people with dementia, are often focused on periods  
28 before some people with YOD were born, and may not resonate well with them.  
29  
30  
31

## 32 33 **Conclusions**

34 Participants in this study gave detailed accounts of their needs and experiences relating to living with  
35 YOD, and described a wide range of issues that affected them. Our findings suggest that those who  
36 have a diagnosis of YOD see themselves as distinct from older people with the condition – even if they  
37 experience similar symptoms. As awareness of YOD continues to grow, the development (or  
38 adaptation) of support services which can take into account the particular requirements of this  
39 younger group need to be addressed. Although the number of people with YOD is admittedly  
40 extremely small when compared with the number of older people with dementia, there is potential for  
41 incremental (and inexpensive) adjustments to existing health and social care interventions which could  
42 make a significant difference to their ability to live independently, with good quality of life, for as long  
43 as possible.  
44  
45  
46  
47  
48

## 49 **Funding.**

50 This work was supported by a project grant from The Booth Charities, Salford, UK. The full title of the  
51 study was: *'Living well with young onset dementia - Humphrey Booth Resource Centre as a hub of  
52 excellence in a system of support.'*  
53  
54

## 55 **Competing interests.**

56 None  
57  
58  
59  
60

**Ethical review.**

Approval for the study was obtained from the Health Research Authority – Preston Research Ethics Committee. (REC Reference Number: 15/NW/0921.)

**Author contributions:**

JC led on the writing and participated in the analysis. LR gathered the data, led the analysis and participated in the writing. TW conceived the research idea and study design, and participated in the analysis and writing. MO undertook some interviews and analysis, and writing. AW contributed to writing. All authors commented on and approved the final version of the manuscript.

**Acknowledgements:**

We would like to thank all of the participants in the study for sharing their experiences and all members of the study advisory and steering groups.

**Data Sharing:**

No additional data are available.

**References**

- 1 Alzheimer's Research. Alzheimer's Society 2017. London.
- 2 De Waal H, Lyketsos C, Ames D, O'Brien J. Designing and Delivering Dementia Services. Cambridge. Wiley Blackwell. 2013.
- 3 Department of Health. The National Dementia Strategy London. Crown Copyright. (2009)
- 4 Public Health England. Dementia: Applying all our Health. London. Crown Copyright. (2017)
- 5 Department of Health. Making a Difference in Dementia: Nursing Vision and Strategy. London. Crown Copyright. (2016)
- 6 Department of Health. Living well with Dementia: a national Dementia Strategy. London. Crown Copyright. (2011)
- 7 Department of Health. Prime Minister's Challenge on Dementia: Delivering Major Improvements in Dementia Care by 2015. London. Crown Copyright (2012)
- 8 National Institute for Health and Clinical Excellence and the Social Care Institute for Excellence. Dementia: The NICE-SCIE Guideline on Supporting People with Dementia and their Carers in Health and Social Care – Amended to Include Guideline 421. London. Crown Copyright. (2011)
- 9 Donnellan W J, Bennett K M, Soulsby L K. Family close but friends closer: exploring social support and resilience in older spousal dementia carers. *Aging & Mental Health* 2017;21.11:1222-1228.

- 1  
2  
3 10 O'Dwyer S T, Moyle W, Zimmer-Gembeck M, De Leo D. Suicidal ideation in family carers of people  
4 with dementia. *Aging & Mental Health*. 2016;20.2:222-230.  
5  
6 11 Peel E, Harding R. 'It's a huge maze, the system, it's a terrible maze': Dementia carers'  
7 constructions of navigating health and social care services. *Dementia*. 2014;13.5:642-661.  
8  
9 12 Public Health England. Dementia and housing: an assessment tool for local commissioning.  
10 London. Crown Copyright. (2016)  
11  
12 13 Department of Health. Post-legislative assessment of the Health and Social Care Act 2008  
13 Memorandum to the House of Commons Health Select Committee. London. Crown Copyright. (2013).  
14  
15 14 Alzheimer's Research. Alzheimer's Society 2017. London.  
16  
17 15 Jefferies K, Agrawal N. Early-onset dementia. *Advances in psychiatric treatment*. 2009;55.5:380-  
18 388.  
19  
20 16 Bentham P, La Fontaine J. Services for younger people with dementia. *Psychiatry*. 2008;7.2:84-87  
21  
22 17 Werner P, Stein-Shvachman I, Korczyn A D. Early onset dementia: *clinical and social aspects*.  
23 *International Psychogeriatrics*. 2009;21.4:631-636.  
24  
25 18 Pilon-Young F E, Lee K M, Jones F, Guss R. I'm not all gone, I can still speak: The experiences of  
26 younger people with dementia. An action research study. *Dementia*. 2012;11.5:596-616.  
27  
28 19 Harris P B, Keady J. Selfhood in younger onset dementia: transitions and testimonies. *Aging and*  
29 *Mental Health*. 2009;13.3:437-444.  
30  
31 20 Roach P, Keady J, Bee P, Hope P. Subjective experiences of younger people with dementia and  
32 their families: implications for UK research, policy and practice. *Reviews in Clinical Gerontology*.  
33 2008;18.2:165-174  
34  
35 21 Luscombe G, Brodaty H, Freeth S. Younger people with dementia: diagnostic issues, effects on  
36 carers and use of services. *International Journal of Geriatric Psychiatry*. 1998;13.5:323-330.  
37  
38 22 Beattie A, Daker-White G, Gilliard J, Means R. 'How can they tell?' A qualitative study of the views  
39 of younger people about their dementia and dementia care services. *Health & Social Care in the*  
40 *Community*. 2014;12.4:359-368.  
41  
42 23 Harris P B, Keady J. Selfhood in younger onset dementia: transitions and testimonies. *Aging and*  
43 *Mental Health*. 2009;13.3:437-444.  
44  
45 24 Rayment D, Kuruvilla T. Service Provision for Young-Onset Dementia in the UK. *Progress in*  
46 *Neurology and Psychiatry*. 2015:28-30  
47  
48 25 Kaiser S, Panegyres P K. The psychosocial impact of young onset dementia on spouses. *American*  
49 *Journal of Alzheimer's Disease & Other Dementias*. 2007;21.6:398-402.  
50  
51 26 Withall A. The Challenges of Service Provision in Younger-Onset Dementia. *Journal of the American*  
52 *Medical Directors Association*. 2013:230-232.  
53  
54 27 Connolly P, Perea N. *Developing an Ideal Old Age Service*. Royal College of Psychiatrists 2013.  
55 London.  
56  
57  
58  
59  
60

- 1  
2  
3 28 Clemerson G, Walsh S, Issac C. Towards living well with young onset dementia: an exploration of  
4 coping from the perspective of those diagnosed. *Dementia*. 2013;13.4:451–466  
5  
6 29 Smith J A, Flowers P, Larkin M. Interpretative Phenomenological Analysis. London. Sage  
7 Publications Ltd. 2009  
8  
9 30 Cronin-Davis J, Butler A, Mayers C A. Occupational therapy and interpretative phenomenological  
10 analysis: comparable research companions? *British Journal of Occupational Therapy*. 2009;72.8:332 –  
11 338.  
12  
13 31 Ahmad S, Orrell M, Iliffe S, Gracie A. GPs' attitudes, awareness, and practice regarding early  
14 diagnosis of dementia. *Br J Gen Pract*. 2010; 60.578: 360-e365.  
15  
16 32 Page S, Keady, J. Sharing stories: a meta-ethnographic analysis of 12 autobiographies written by  
17 people with dementia between 1989 and 2007. *Ageing & Society*. 2010;30.3:511-526.  
18  
19 33 McMurtray A, Clark D G, Christine D, Mendez M F. Early-onset dementia: frequency and causes  
20 compared to late-onset dementia. *Dementia and Geriatric Cognitive Disorders*. 2006;21.2:59-64.  
21  
22 34 Baptista M A T, Santos R L, Kimura N, Lacerda I B, Johannessen A, Barca M L, Engedal K, Dourado  
23 M C N. Quality of life in young onset dementia: an updated systematic review. *Trends in Psychiatry and*  
24 *Psychotherapy*. 2016; 38.1:6-13.  
25  
26 35 Svanberg E, Spector A, Stott, J. The impact of young onset dementia on the family: a literature  
27 review. *International Psychogeriatrics*. 2011;23.3:356-371.  
28  
29 36 Van Vliet D, Persoon A, Bakker C, Koopmans R T, de Vugt M E, Bielderma A, Gerritsen D L. Feeling  
30 useful and engaged in daily life: exploring the experiences of people with young-onset dementia.  
31 *International Psychogeriatrics*. 2017:1-10.  
32  
33 37 Draper B, Cations M, White F, Trollor J, Loy C, Brodaty H, Sachdev P, Gonski P, Demirkol A,  
34 Cumming R G, Withall A. Time to diagnosis in young-onset dementia and its determinants: the  
35 INSPIRED study. *International journal of geriatric psychiatry*. 2016;31.11:1217-1224.  
36  
37 38 Van Vliet D, de Vugt M E, Bakker C, Pijnenburg Y A L, Vernooij-Dassen M J F J, Koopmans R T C M,  
38 Verhey F R J. Time to diagnosis in young-onset dementia as compared with late-onset dementia.  
39 *Psychological Medicine*. 2013;43.2:423-432.  
40  
41 39 Thoits P A. Self, identity, stress, and mental health. In Handbook of the sociology of mental health.  
42 Netherlands. Springer. 2013: 357-377  
43  
44 40 Caddell L S, Clare L. The impact of dementia on self and identity: A systematic review. *Clinical*  
45 *Psychology Review*. 2010; 30.1:113-126.  
46  
47 41 Mendez M F. The accurate diagnosis of early-onset dementia. *The International Journal of*  
48 *Psychiatry in Medicine*. 2006;36.4:401-412.  
49  
50 42 Harding R, Selman L, Beynon T, Hodson F, Coady E, Read C, Walton M, Gibbs L, Higginson I J.  
51 Meeting the communication and information needs of chronic heart failure patients. *Journal of Pain*  
52 *and Symptom Management*. 2008;36.2:149-156.  
53  
54 43 Cox A, Jenkins V, Catt S, Langridge C, Fallowfield L. Information needs and experiences: an audit of  
55 UK cancer patients. *European Journal of Oncology Nursing*. 2006;10.4:263-272.  
56  
57  
58  
59  
60



| Participant | Gender | Age at diagnosis |
|-------------|--------|------------------|
| 1           | Female | 55               |
| 2           | Female | 52               |
| 3           | Female | 57               |
| 4           | Female | 61               |
| 5           | Male   | 59               |
| 6           | Female | 58               |
| 7           | Male   | 64               |
| 8           | Male   | 54               |
| 9           | Female | 61               |
| 10          | Male   | 57               |
| 11          | Female | 55               |
| 12          | Male   | 62               |
| 13          | Female | 56               |
| 14          | Male   | 62               |

*Table 1: Age at diagnosis and gender of participants*

| <b>Superordinate theme</b> | <b>Subordinate theme</b> | <b>Key words and issues</b> |
|----------------------------|--------------------------|-----------------------------|
|----------------------------|--------------------------|-----------------------------|

---

|    |                                                      |                                          |                                                                                                    |  |
|----|------------------------------------------------------|------------------------------------------|----------------------------------------------------------------------------------------------------|--|
| 1  |                                                      |                                          |                                                                                                    |  |
| 2  |                                                      |                                          |                                                                                                    |  |
| 3  |                                                      |                                          |                                                                                                    |  |
| 4  | <b>1. Process of diagnosis</b>                       | <i>Pre-diagnosis</i>                     | Warning signs, alarm bells, too young                                                              |  |
| 5  |                                                      | <i>'Hit by a sledge hammer'</i>          | Sledgehammer, shock, lack of support, information overload                                         |  |
| 6  |                                                      | <i>Post-diagnosis</i>                    | Benefits, no follow up, looking for answers                                                        |  |
| 7  |                                                      |                                          |                                                                                                    |  |
| 8  |                                                      |                                          |                                                                                                    |  |
| 9  |                                                      |                                          |                                                                                                    |  |
| 10 |                                                      |                                          |                                                                                                    |  |
| 11 |                                                      |                                          |                                                                                                    |  |
| 12 |                                                      |                                          |                                                                                                    |  |
| 13 | <b>2. Impact of living with young onset dementia</b> | <i>Impact on behavior &amp; function</i> | Activities of daily living, money, cooking, communication, uncharacteristic behavior, loss of self |  |
| 14 |                                                      |                                          |                                                                                                    |  |
| 15 |                                                      |                                          |                                                                                                    |  |
| 16 |                                                      |                                          |                                                                                                    |  |
| 17 |                                                      |                                          |                                                                                                    |  |
| 18 |                                                      |                                          |                                                                                                    |  |
| 19 |                                                      | <i>Psychological impact</i>              | Fear of the future, covering up, living a double life                                              |  |
| 20 |                                                      |                                          |                                                                                                    |  |
| 21 |                                                      |                                          |                                                                                                    |  |
| 22 |                                                      |                                          |                                                                                                    |  |
| 23 |                                                      | <i>Impact on work</i>                    | Devastation, loss, forgetting things                                                               |  |
| 24 | <b>3. Needs of people with young onset dementia</b>  | <i>'They are my rock'</i>                | Support, friends and family, spouse                                                                |  |
| 25 |                                                      |                                          |                                                                                                    |  |
| 26 |                                                      |                                          |                                                                                                    |  |
| 27 |                                                      | <i>What helps?</i>                       | Peer support, Open Doors Network, Mount Chapel Champions                                           |  |
| 28 |                                                      |                                          |                                                                                                    |  |
| 29 |                                                      |                                          |                                                                                                    |  |
| 30 |                                                      |                                          |                                                                                                    |  |
| 31 |                                                      |                                          |                                                                                                    |  |
| 32 |                                                      | <i>What could be improved?</i>           | Raising dementia awareness, it's more than just memory, dementia groups                            |  |
| 33 |                                                      |                                          |                                                                                                    |  |
| 34 |                                                      |                                          |                                                                                                    |  |
| 35 |                                                      |                                          |                                                                                                    |  |
| 36 | <b>4. Living well with young onset dementia</b>      | <i>Psychological coping strategies</i>   | Positivity, optimism                                                                               |  |
| 37 |                                                      |                                          |                                                                                                    |  |
| 38 | <b>* not reported on here</b>                        |                                          |                                                                                                    |  |
| 39 |                                                      | <i>Practical coping strategies</i>       | Simple things, routine, familiarity                                                                |  |
| 40 |                                                      |                                          |                                                                                                    |  |
| 41 |                                                      |                                          |                                                                                                    |  |
| 42 |                                                      | <i>'Trying to keep occupied'</i>         |                                                                                                    |  |
| 43 |                                                      |                                          |                                                                                                    |  |
| 44 |                                                      |                                          |                                                                                                    |  |
| 45 |                                                      |                                          | Therapeutic benefits of activity                                                                   |  |
| 46 |                                                      |                                          |                                                                                                    |  |

Table 2: Superordinate and subordinate themes from IPA analysis of all participants living with young onset dementia

**STROBE statement – checklist of items, extended from the STROBE statement, that should be reported in observational studies that collect health data.**

**Understanding the needs and experiences of people with young onset dementia: a qualitative study**

| Item No. | STROBE items                                                                                                                                                                               | Location in manuscript where items are reported | RECORD items                                                                                                                                                                                                                                                                                                                                                                                                                                       | Location in manuscript where items are reported |
|----------|--------------------------------------------------------------------------------------------------------------------------------------------------------------------------------------------|-------------------------------------------------|----------------------------------------------------------------------------------------------------------------------------------------------------------------------------------------------------------------------------------------------------------------------------------------------------------------------------------------------------------------------------------------------------------------------------------------------------|-------------------------------------------------|
| 1        | (a) Indicate the study's design with a commonly used term in the title or the abstract (b) Provide in the abstract an informative and balanced summary of what was done and what was found | Page 2 (abstract)                               | <p>RECORD 1.1: The type of data used should be specified in the title or abstract. When possible, the name of the databases used should be included.</p> <p>RECORD 1.2: If applicable, the geographic region and timeframe within which the study took place should be reported in the title or abstract.</p> <p>RECORD 1.3: If linkage between databases was conducted for the study, this should be clearly stated in the title or abstract.</p> |                                                 |
| 2        | Explain the scientific background and rationale for the investigation being reported                                                                                                       | Page 3                                          |                                                                                                                                                                                                                                                                                                                                                                                                                                                    |                                                 |
| 3        | State specific objectives, including any prespecified hypotheses                                                                                                                           | Page 3                                          |                                                                                                                                                                                                                                                                                                                                                                                                                                                    |                                                 |
| 4        | Present key elements of study design early in the paper                                                                                                                                    | Page 3                                          |                                                                                                                                                                                                                                                                                                                                                                                                                                                    |                                                 |

|                                                                                                                                                                 |   |                                                                                                                                                                                                                                                                                                                                                                                                                                                                                                                                                                                                                                                                                                                              |                  |                                                                                                                                                                                                                                                                                                                                                                                                                                                                                                                                                                                                                                                                                                      |  |
|-----------------------------------------------------------------------------------------------------------------------------------------------------------------|---|------------------------------------------------------------------------------------------------------------------------------------------------------------------------------------------------------------------------------------------------------------------------------------------------------------------------------------------------------------------------------------------------------------------------------------------------------------------------------------------------------------------------------------------------------------------------------------------------------------------------------------------------------------------------------------------------------------------------------|------------------|------------------------------------------------------------------------------------------------------------------------------------------------------------------------------------------------------------------------------------------------------------------------------------------------------------------------------------------------------------------------------------------------------------------------------------------------------------------------------------------------------------------------------------------------------------------------------------------------------------------------------------------------------------------------------------------------------|--|
| 1<br>2<br>3<br>4                                                                                                                                                | 5 | Describe the setting, locations, and relevant dates, including periods of recruitment, exposure, follow-up, and data collection                                                                                                                                                                                                                                                                                                                                                                                                                                                                                                                                                                                              | Page 3           |                                                                                                                                                                                                                                                                                                                                                                                                                                                                                                                                                                                                                                                                                                      |  |
| 5<br>6<br>7<br>8<br>9<br>10<br>11<br>12<br>13<br>14<br>15<br>16<br>17<br>18<br>19<br>20<br>21<br>22<br>23<br>24<br>25<br>26<br>27<br>28<br>29<br>30<br>31<br>32 | 6 | <p>(a) <i>Cohort study</i> - Give the eligibility criteria, and the sources and methods of selection of participants. Describe methods of follow-up</p> <p><i>Case-control study</i> - Give the eligibility criteria, and the sources and methods of case ascertainment and control selection. Give the rationale for the choice of cases and controls</p> <p><i>Cross-sectional study</i> - Give the eligibility criteria, and the sources and methods of selection of participants</p> <p>(b) <i>Cohort study</i> - For matched studies, give matching criteria and number of exposed and unexposed</p> <p><i>Case-control study</i> - For matched studies, give matching criteria and the number of controls per case</p> | Page 4 (sample)  | <p>RECORD 6.1: The methods of study population selection (such as codes or algorithms used to identify subjects) should be listed in detail. If this is not possible, an explanation should be provided.</p> <p>RECORD 6.2: Any validation studies of the codes or algorithms used to select the population should be referenced. If validation was conducted for this study and not published elsewhere, detailed methods and results should be provided.</p> <p>RECORD 6.3: If the study involved linkage of databases, consider use of a flow diagram or other graphical display to demonstrate the data linkage process, including the number of individuals with linked data at each stage.</p> |  |
| 33<br>34<br>35<br>36<br>37<br>38<br>39                                                                                                                          | 7 | Clearly define all outcomes, exposures, predictors, potential confounders, and effect modifiers. Give diagnostic criteria, if applicable.                                                                                                                                                                                                                                                                                                                                                                                                                                                                                                                                                                                    | N/A – qual study | RECORD 7.1: A complete list of codes and algorithms used to classify exposures, outcomes, confounders, and effect modifiers should be provided. If these cannot be reported, an explanation should be provided.                                                                                                                                                                                                                                                                                                                                                                                                                                                                                      |  |
| 40<br>41<br>42<br>43                                                                                                                                            | 8 | For each variable of interest, give sources of data and details of methods of assessment (measurement).                                                                                                                                                                                                                                                                                                                                                                                                                                                                                                                                                                                                                      | N/A – qual study |                                                                                                                                                                                                                                                                                                                                                                                                                                                                                                                                                                                                                                                                                                      |  |

|    |    |                                                                                                                                                                                                                                                                                                                                                                                                                                                                                                                                                                      |                            |                                                                                                       |
|----|----|----------------------------------------------------------------------------------------------------------------------------------------------------------------------------------------------------------------------------------------------------------------------------------------------------------------------------------------------------------------------------------------------------------------------------------------------------------------------------------------------------------------------------------------------------------------------|----------------------------|-------------------------------------------------------------------------------------------------------|
| 1  |    | Describe comparability of assessment methods if there is more than one group                                                                                                                                                                                                                                                                                                                                                                                                                                                                                         |                            |                                                                                                       |
| 2  |    |                                                                                                                                                                                                                                                                                                                                                                                                                                                                                                                                                                      |                            |                                                                                                       |
| 3  |    |                                                                                                                                                                                                                                                                                                                                                                                                                                                                                                                                                                      |                            |                                                                                                       |
| 4  | 9  | Describe any efforts to address potential sources of bias                                                                                                                                                                                                                                                                                                                                                                                                                                                                                                            | Page 4                     |                                                                                                       |
| 5  |    |                                                                                                                                                                                                                                                                                                                                                                                                                                                                                                                                                                      |                            |                                                                                                       |
| 6  |    |                                                                                                                                                                                                                                                                                                                                                                                                                                                                                                                                                                      |                            |                                                                                                       |
| 7  | 10 | Explain how the study size was arrived at                                                                                                                                                                                                                                                                                                                                                                                                                                                                                                                            | Page 4                     |                                                                                                       |
| 8  |    |                                                                                                                                                                                                                                                                                                                                                                                                                                                                                                                                                                      |                            |                                                                                                       |
| 9  |    |                                                                                                                                                                                                                                                                                                                                                                                                                                                                                                                                                                      |                            |                                                                                                       |
| 10 |    |                                                                                                                                                                                                                                                                                                                                                                                                                                                                                                                                                                      |                            |                                                                                                       |
| 11 | 11 | Explain how quantitative variables were handled in the analyses. If applicable, describe which groupings were chosen, and why                                                                                                                                                                                                                                                                                                                                                                                                                                        | N/A quant methods not used |                                                                                                       |
| 12 |    |                                                                                                                                                                                                                                                                                                                                                                                                                                                                                                                                                                      |                            |                                                                                                       |
| 13 |    |                                                                                                                                                                                                                                                                                                                                                                                                                                                                                                                                                                      |                            |                                                                                                       |
| 14 |    |                                                                                                                                                                                                                                                                                                                                                                                                                                                                                                                                                                      |                            |                                                                                                       |
| 15 |    |                                                                                                                                                                                                                                                                                                                                                                                                                                                                                                                                                                      |                            |                                                                                                       |
| 16 | 12 | (a) Describe all statistical methods, including those used to control for confounding<br>(b) Describe any methods used to examine subgroups and interactions<br>(c) Explain how missing data were addressed<br>(d) <i>Cohort study</i> - If applicable, explain how loss to follow-up was addressed<br><i>Case-control study</i> - If applicable, explain how matching of cases and controls was addressed<br><i>Cross-sectional study</i> - If applicable, describe analytical methods taking account of sampling strategy<br>(e) Describe any sensitivity analyses | N/A stats not used         |                                                                                                       |
| 17 |    |                                                                                                                                                                                                                                                                                                                                                                                                                                                                                                                                                                      |                            |                                                                                                       |
| 18 |    |                                                                                                                                                                                                                                                                                                                                                                                                                                                                                                                                                                      |                            |                                                                                                       |
| 19 |    |                                                                                                                                                                                                                                                                                                                                                                                                                                                                                                                                                                      |                            |                                                                                                       |
| 20 |    |                                                                                                                                                                                                                                                                                                                                                                                                                                                                                                                                                                      |                            |                                                                                                       |
| 21 |    |                                                                                                                                                                                                                                                                                                                                                                                                                                                                                                                                                                      |                            |                                                                                                       |
| 22 |    |                                                                                                                                                                                                                                                                                                                                                                                                                                                                                                                                                                      |                            |                                                                                                       |
| 23 |    |                                                                                                                                                                                                                                                                                                                                                                                                                                                                                                                                                                      |                            |                                                                                                       |
| 24 |    |                                                                                                                                                                                                                                                                                                                                                                                                                                                                                                                                                                      |                            |                                                                                                       |
| 25 |    |                                                                                                                                                                                                                                                                                                                                                                                                                                                                                                                                                                      |                            |                                                                                                       |
| 26 |    |                                                                                                                                                                                                                                                                                                                                                                                                                                                                                                                                                                      |                            |                                                                                                       |
| 27 |    |                                                                                                                                                                                                                                                                                                                                                                                                                                                                                                                                                                      |                            |                                                                                                       |
| 28 |    |                                                                                                                                                                                                                                                                                                                                                                                                                                                                                                                                                                      |                            |                                                                                                       |
| 29 |    |                                                                                                                                                                                                                                                                                                                                                                                                                                                                                                                                                                      |                            |                                                                                                       |
| 30 |    |                                                                                                                                                                                                                                                                                                                                                                                                                                                                                                                                                                      |                            |                                                                                                       |
| 31 |    |                                                                                                                                                                                                                                                                                                                                                                                                                                                                                                                                                                      |                            |                                                                                                       |
| 32 |    |                                                                                                                                                                                                                                                                                                                                                                                                                                                                                                                                                                      |                            |                                                                                                       |
| 33 |    |                                                                                                                                                                                                                                                                                                                                                                                                                                                                                                                                                                      |                            |                                                                                                       |
| 34 |    |                                                                                                                                                                                                                                                                                                                                                                                                                                                                                                                                                                      |                            |                                                                                                       |
| 35 |    |                                                                                                                                                                                                                                                                                                                                                                                                                                                                                                                                                                      |                            |                                                                                                       |
| 36 |    |                                                                                                                                                                                                                                                                                                                                                                                                                                                                                                                                                                      |                            |                                                                                                       |
| 37 |    |                                                                                                                                                                                                                                                                                                                                                                                                                                                                                                                                                                      |                            |                                                                                                       |
| 38 |    |                                                                                                                                                                                                                                                                                                                                                                                                                                                                                                                                                                      |                            |                                                                                                       |
| 39 |    |                                                                                                                                                                                                                                                                                                                                                                                                                                                                                                                                                                      |                            |                                                                                                       |
| 40 |    |                                                                                                                                                                                                                                                                                                                                                                                                                                                                                                                                                                      |                            |                                                                                                       |
| 41 |    |                                                                                                                                                                                                                                                                                                                                                                                                                                                                                                                                                                      |                            |                                                                                                       |
| 42 |    |                                                                                                                                                                                                                                                                                                                                                                                                                                                                                                                                                                      |                            |                                                                                                       |
| 43 |    | ..                                                                                                                                                                                                                                                                                                                                                                                                                                                                                                                                                                   | N/A                        | RECORD 12.1: Authors should describe the extent to which the investigators had access to the database |

44  
45  
46  
47  
48  
49  
50  
51  
52  
53  
54  
55  
56  
57  
58  
59  
60

|    |    |                                                                                                                                                                                                                                                                                                                                                 |        |                                                                                                                                                                                                                                                                                                                    |  |
|----|----|-------------------------------------------------------------------------------------------------------------------------------------------------------------------------------------------------------------------------------------------------------------------------------------------------------------------------------------------------|--------|--------------------------------------------------------------------------------------------------------------------------------------------------------------------------------------------------------------------------------------------------------------------------------------------------------------------|--|
| 1  |    |                                                                                                                                                                                                                                                                                                                                                 |        | population used to create the study population.                                                                                                                                                                                                                                                                    |  |
| 2  |    |                                                                                                                                                                                                                                                                                                                                                 |        |                                                                                                                                                                                                                                                                                                                    |  |
| 3  |    |                                                                                                                                                                                                                                                                                                                                                 |        |                                                                                                                                                                                                                                                                                                                    |  |
| 4  |    |                                                                                                                                                                                                                                                                                                                                                 |        | RECORD 12.2: Authors should provide information on the data cleaning methods used in the study.                                                                                                                                                                                                                    |  |
| 5  |    |                                                                                                                                                                                                                                                                                                                                                 |        |                                                                                                                                                                                                                                                                                                                    |  |
| 6  |    |                                                                                                                                                                                                                                                                                                                                                 |        |                                                                                                                                                                                                                                                                                                                    |  |
| 7  |    | ..                                                                                                                                                                                                                                                                                                                                              | N/A    | RECORD 12.3: State whether the study included person-level, institutional-level, or other data linkage across two or more databases. The methods of linkage and methods of linkage quality evaluation should be provided.                                                                                          |  |
| 8  |    |                                                                                                                                                                                                                                                                                                                                                 |        |                                                                                                                                                                                                                                                                                                                    |  |
| 9  |    |                                                                                                                                                                                                                                                                                                                                                 |        |                                                                                                                                                                                                                                                                                                                    |  |
| 10 |    |                                                                                                                                                                                                                                                                                                                                                 |        |                                                                                                                                                                                                                                                                                                                    |  |
| 11 |    |                                                                                                                                                                                                                                                                                                                                                 |        |                                                                                                                                                                                                                                                                                                                    |  |
| 12 |    |                                                                                                                                                                                                                                                                                                                                                 |        |                                                                                                                                                                                                                                                                                                                    |  |
| 13 |    |                                                                                                                                                                                                                                                                                                                                                 |        |                                                                                                                                                                                                                                                                                                                    |  |
| 14 |    |                                                                                                                                                                                                                                                                                                                                                 |        |                                                                                                                                                                                                                                                                                                                    |  |
| 15 |    |                                                                                                                                                                                                                                                                                                                                                 |        |                                                                                                                                                                                                                                                                                                                    |  |
| 16 |    |                                                                                                                                                                                                                                                                                                                                                 |        |                                                                                                                                                                                                                                                                                                                    |  |
| 17 | 13 | (a) Report the numbers of individuals at each stage of the study ( <i>e.g.</i> , numbers potentially eligible, examined for eligibility, confirmed eligible, included in the study, completing follow-up, and analysed)<br>(b) Give reasons for non-participation at each stage.<br>(c) Consider use of a flow diagram                          | Page 4 | RECORD 13.1: Describe in detail the selection of the persons included in the study ( <i>i.e.</i> , study population selection) including filtering based on data quality, data availability and linkage. The selection of included persons can be described in the text and/or by means of the study flow diagram. |  |
| 18 |    |                                                                                                                                                                                                                                                                                                                                                 |        |                                                                                                                                                                                                                                                                                                                    |  |
| 19 |    |                                                                                                                                                                                                                                                                                                                                                 |        |                                                                                                                                                                                                                                                                                                                    |  |
| 20 |    |                                                                                                                                                                                                                                                                                                                                                 |        |                                                                                                                                                                                                                                                                                                                    |  |
| 21 |    |                                                                                                                                                                                                                                                                                                                                                 |        |                                                                                                                                                                                                                                                                                                                    |  |
| 22 |    |                                                                                                                                                                                                                                                                                                                                                 |        |                                                                                                                                                                                                                                                                                                                    |  |
| 23 |    |                                                                                                                                                                                                                                                                                                                                                 |        |                                                                                                                                                                                                                                                                                                                    |  |
| 24 |    |                                                                                                                                                                                                                                                                                                                                                 |        |                                                                                                                                                                                                                                                                                                                    |  |
| 25 |    |                                                                                                                                                                                                                                                                                                                                                 |        |                                                                                                                                                                                                                                                                                                                    |  |
| 26 |    |                                                                                                                                                                                                                                                                                                                                                 |        |                                                                                                                                                                                                                                                                                                                    |  |
| 27 |    |                                                                                                                                                                                                                                                                                                                                                 |        |                                                                                                                                                                                                                                                                                                                    |  |
| 28 |    |                                                                                                                                                                                                                                                                                                                                                 |        |                                                                                                                                                                                                                                                                                                                    |  |
| 29 | 14 | (a) Give characteristics of study participants ( <i>e.g.</i> , demographic, clinical, social) and information on exposures and potential confounders<br>(b) Indicate the number of participants with missing data for each variable of interest<br>(c) <i>Cohort study</i> - summarise follow-up time ( <i>e.g.</i> , average and total amount) | Page 4 |                                                                                                                                                                                                                                                                                                                    |  |
| 30 |    |                                                                                                                                                                                                                                                                                                                                                 |        |                                                                                                                                                                                                                                                                                                                    |  |
| 31 |    |                                                                                                                                                                                                                                                                                                                                                 |        |                                                                                                                                                                                                                                                                                                                    |  |
| 32 |    |                                                                                                                                                                                                                                                                                                                                                 |        |                                                                                                                                                                                                                                                                                                                    |  |
| 33 |    |                                                                                                                                                                                                                                                                                                                                                 |        |                                                                                                                                                                                                                                                                                                                    |  |
| 34 |    |                                                                                                                                                                                                                                                                                                                                                 |        |                                                                                                                                                                                                                                                                                                                    |  |
| 35 |    |                                                                                                                                                                                                                                                                                                                                                 |        |                                                                                                                                                                                                                                                                                                                    |  |
| 36 |    |                                                                                                                                                                                                                                                                                                                                                 |        |                                                                                                                                                                                                                                                                                                                    |  |
| 37 |    |                                                                                                                                                                                                                                                                                                                                                 |        |                                                                                                                                                                                                                                                                                                                    |  |
| 38 |    |                                                                                                                                                                                                                                                                                                                                                 |        |                                                                                                                                                                                                                                                                                                                    |  |
| 39 |    |                                                                                                                                                                                                                                                                                                                                                 |        |                                                                                                                                                                                                                                                                                                                    |  |
| 40 |    |                                                                                                                                                                                                                                                                                                                                                 |        |                                                                                                                                                                                                                                                                                                                    |  |
| 41 |    |                                                                                                                                                                                                                                                                                                                                                 |        |                                                                                                                                                                                                                                                                                                                    |  |
| 42 | 15 | <i>Cohort study</i> - Report numbers of outcome events or summary                                                                                                                                                                                                                                                                               | N/A    |                                                                                                                                                                                                                                                                                                                    |  |
| 43 |    |                                                                                                                                                                                                                                                                                                                                                 |        |                                                                                                                                                                                                                                                                                                                    |  |
| 44 |    |                                                                                                                                                                                                                                                                                                                                                 |        |                                                                                                                                                                                                                                                                                                                    |  |
| 45 |    |                                                                                                                                                                                                                                                                                                                                                 |        |                                                                                                                                                                                                                                                                                                                    |  |
| 46 |    |                                                                                                                                                                                                                                                                                                                                                 |        |                                                                                                                                                                                                                                                                                                                    |  |
| 47 |    |                                                                                                                                                                                                                                                                                                                                                 |        |                                                                                                                                                                                                                                                                                                                    |  |
| 48 |    |                                                                                                                                                                                                                                                                                                                                                 |        |                                                                                                                                                                                                                                                                                                                    |  |
| 49 |    |                                                                                                                                                                                                                                                                                                                                                 |        |                                                                                                                                                                                                                                                                                                                    |  |
| 50 |    |                                                                                                                                                                                                                                                                                                                                                 |        |                                                                                                                                                                                                                                                                                                                    |  |
| 51 |    |                                                                                                                                                                                                                                                                                                                                                 |        |                                                                                                                                                                                                                                                                                                                    |  |
| 52 |    |                                                                                                                                                                                                                                                                                                                                                 |        |                                                                                                                                                                                                                                                                                                                    |  |
| 53 |    |                                                                                                                                                                                                                                                                                                                                                 |        |                                                                                                                                                                                                                                                                                                                    |  |
| 54 |    |                                                                                                                                                                                                                                                                                                                                                 |        |                                                                                                                                                                                                                                                                                                                    |  |
| 55 |    |                                                                                                                                                                                                                                                                                                                                                 |        |                                                                                                                                                                                                                                                                                                                    |  |
| 56 |    |                                                                                                                                                                                                                                                                                                                                                 |        |                                                                                                                                                                                                                                                                                                                    |  |
| 57 |    |                                                                                                                                                                                                                                                                                                                                                 |        |                                                                                                                                                                                                                                                                                                                    |  |
| 58 |    |                                                                                                                                                                                                                                                                                                                                                 |        |                                                                                                                                                                                                                                                                                                                    |  |
| 59 |    |                                                                                                                                                                                                                                                                                                                                                 |        |                                                                                                                                                                                                                                                                                                                    |  |
| 60 |    |                                                                                                                                                                                                                                                                                                                                                 |        |                                                                                                                                                                                                                                                                                                                    |  |

|    |    |                                       |                       |                                          |
|----|----|---------------------------------------|-----------------------|------------------------------------------|
| 1  |    | measures over time                    |                       |                                          |
| 2  |    | <i>Case-control study</i> - Report    |                       |                                          |
| 3  |    | numbers in each exposure              |                       |                                          |
| 4  |    | category, or summary measures         |                       |                                          |
| 5  |    | of exposure                           |                       |                                          |
| 6  |    | <i>Cross-sectional study</i> - Report |                       |                                          |
| 7  |    | numbers of outcome events or          |                       |                                          |
| 8  |    | summary measures                      |                       |                                          |
| 9  |    |                                       |                       |                                          |
| 10 | 16 | (a) Give unadjusted estimates         | Page 5                |                                          |
| 11 |    | and, if applicable, confounder-       | (Most items N/A –     |                                          |
| 12 |    | adjusted estimates and their          | we used standard      |                                          |
| 13 |    | precision (e.g., 95% confidence       | qualitative reporting |                                          |
| 14 |    | interval). Make clear which           | methods)              |                                          |
| 15 |    | confounders were adjusted for         |                       |                                          |
| 16 |    | and why they were included            |                       |                                          |
| 17 |    | (b) Report category boundaries        |                       |                                          |
| 18 |    | when continuous variables were        |                       |                                          |
| 19 |    | categorized                           |                       |                                          |
| 20 |    | (c) If relevant, consider             |                       |                                          |
| 21 |    | translating estimates of relative     |                       |                                          |
| 22 |    | risk into absolute risk for a         |                       |                                          |
| 23 |    | meaningful time period                |                       |                                          |
| 24 |    |                                       |                       |                                          |
| 25 |    |                                       |                       |                                          |
| 26 | 17 | Report other analyses done—           | Page 5                |                                          |
| 27 |    | e.g., analyses of subgroups and       |                       |                                          |
| 28 |    | interactions, and sensitivity         |                       |                                          |
| 29 |    | analyses                              |                       |                                          |
| 30 |    |                                       |                       |                                          |
| 31 | 18 | Summarise key results with            | Page 10               |                                          |
| 32 |    | reference to study objectives         |                       |                                          |
| 33 |    |                                       |                       |                                          |
| 34 |    |                                       |                       |                                          |
| 35 | 19 | Discuss limitations of the study,     | Page 2, page 11       | RECORD 19.1: Discuss the                 |
| 36 |    | taking into account sources of        |                       | implications of using data that were not |
| 37 |    | potential bias or imprecision.        |                       | created or collected to answer the       |
| 38 |    | Discuss both direction and            |                       | specific research question(s). Include   |
| 39 |    | magnitude of any potential bias       |                       | discussion of misclassification bias,    |
| 40 |    |                                       |                       | unmeasured confounding, missing          |
| 41 |    |                                       |                       | data, and changing eligibility over      |
| 42 |    |                                       |                       | time, as they pertain to the study being |
| 43 |    |                                       |                       |                                          |

|    |                    |                                                                                                                                                                            |                                                                                          |                                                                                                                                                          |  |
|----|--------------------|----------------------------------------------------------------------------------------------------------------------------------------------------------------------------|------------------------------------------------------------------------------------------|----------------------------------------------------------------------------------------------------------------------------------------------------------|--|
| 1  |                    |                                                                                                                                                                            |                                                                                          | reported.                                                                                                                                                |  |
| 2  | 20                 | Give a cautious overall interpretation of results considering objectives, limitations, multiplicity of analyses, results from similar studies, and other relevant evidence | Page 11 (conclusions)                                                                    |                                                                                                                                                          |  |
| 3  |                    |                                                                                                                                                                            |                                                                                          |                                                                                                                                                          |  |
| 4  |                    |                                                                                                                                                                            |                                                                                          |                                                                                                                                                          |  |
| 5  |                    |                                                                                                                                                                            |                                                                                          |                                                                                                                                                          |  |
| 6  |                    |                                                                                                                                                                            |                                                                                          |                                                                                                                                                          |  |
| 7  |                    |                                                                                                                                                                            |                                                                                          |                                                                                                                                                          |  |
| 8  |                    |                                                                                                                                                                            |                                                                                          |                                                                                                                                                          |  |
| 9  |                    |                                                                                                                                                                            |                                                                                          |                                                                                                                                                          |  |
| 10 | 21                 | Discuss the generalisability (external validity) of the study results                                                                                                      | Page 11 (conclusions)                                                                    |                                                                                                                                                          |  |
| 11 |                    |                                                                                                                                                                            |                                                                                          |                                                                                                                                                          |  |
| 12 |                    |                                                                                                                                                                            |                                                                                          |                                                                                                                                                          |  |
| 13 |                    |                                                                                                                                                                            |                                                                                          |                                                                                                                                                          |  |
| 14 | <b>Information</b> |                                                                                                                                                                            |                                                                                          |                                                                                                                                                          |  |
| 15 | 22                 | Give the source of funding and the role of the funders for the present study and, if applicable, for the original study on which the present article is based              | Page 11                                                                                  |                                                                                                                                                          |  |
| 16 |                    |                                                                                                                                                                            |                                                                                          |                                                                                                                                                          |  |
| 17 |                    |                                                                                                                                                                            |                                                                                          |                                                                                                                                                          |  |
| 18 |                    |                                                                                                                                                                            |                                                                                          |                                                                                                                                                          |  |
| 19 |                    |                                                                                                                                                                            |                                                                                          |                                                                                                                                                          |  |
| 20 |                    |                                                                                                                                                                            |                                                                                          |                                                                                                                                                          |  |
| 21 |                    | ..                                                                                                                                                                         | N/A (original interview transcripts etc. are not publicly available for ethical reasons) | RECORD 22.1: Authors should provide information on how to access any supplemental information such as the study protocol, raw data, or programming code. |  |
| 22 |                    |                                                                                                                                                                            |                                                                                          |                                                                                                                                                          |  |
| 23 |                    |                                                                                                                                                                            |                                                                                          |                                                                                                                                                          |  |
| 24 |                    |                                                                                                                                                                            |                                                                                          |                                                                                                                                                          |  |
| 25 |                    |                                                                                                                                                                            |                                                                                          |                                                                                                                                                          |  |
| 26 |                    |                                                                                                                                                                            |                                                                                          |                                                                                                                                                          |  |
| 27 |                    |                                                                                                                                                                            |                                                                                          |                                                                                                                                                          |  |
| 28 |                    |                                                                                                                                                                            |                                                                                          |                                                                                                                                                          |  |
| 29 |                    |                                                                                                                                                                            |                                                                                          |                                                                                                                                                          |  |
| 30 |                    |                                                                                                                                                                            |                                                                                          |                                                                                                                                                          |  |

31: Benichou EI, Smeeth L, Guttman A, Harron K, Moher D, Petersen I, Sørensen HT, von Elm E, Langan SM, the RECORD  
 32: Statement. The REporting of studies Conducted using Observational Routinely-collected health Data (RECORD) Statement. *PLoS Med*  
 33

34  
 35  
 36 is protected under Creative Commons Attribution ([CC BY](https://creativecommons.org/licenses/by/4.0/)) license.  
 37  
 38  
 39  
 40  
 41  
 42  
 43  
 44  
 45  
 46  
 47  
 48  
 49  
 50  
 51  
 52  
 53  
 54  
 55  
 56  
 57  
 58  
 59  
 60



# BMJ Open

## Understanding the needs and experiences of people with young onset dementia: a qualitative study

|                                 |                                                                                                                                                                                                                                                                                                                                                                                                                                                                                                           |
|---------------------------------|-----------------------------------------------------------------------------------------------------------------------------------------------------------------------------------------------------------------------------------------------------------------------------------------------------------------------------------------------------------------------------------------------------------------------------------------------------------------------------------------------------------|
| Journal:                        | <i>BMJ Open</i>                                                                                                                                                                                                                                                                                                                                                                                                                                                                                           |
| Manuscript ID                   | bmjopen-2017-021166.R1                                                                                                                                                                                                                                                                                                                                                                                                                                                                                    |
| Article Type:                   | Research                                                                                                                                                                                                                                                                                                                                                                                                                                                                                                  |
| Date Submitted by the Author:   | 20-Mar-2018                                                                                                                                                                                                                                                                                                                                                                                                                                                                                               |
| Complete List of Authors:       | Rabanal , Luisa ; University of Salford, Institute for Dementia, School of Health and Society<br>Chatwin, John; University of Salford, Institute for Dementia, School of Health and Society<br>Walker, Andy ; University of Salford, Institute for Dementia, School of Health and Society<br>O'Sullivan, Maria O'Sullivan; University of Salford, Institute for Dementia, School of Health and Society<br>Williamson, Tracey; University of Salford, Institute for Dementia, School of Health and Society |
| <b>Primary Subject Heading</b>: | Qualitative research                                                                                                                                                                                                                                                                                                                                                                                                                                                                                      |
| Secondary Subject Heading:      | Public health, Patient-centred medicine                                                                                                                                                                                                                                                                                                                                                                                                                                                                   |
| Keywords:                       | Young onset dementia, Dementia < NEUROLOGY, Health policy < HEALTH SERVICES ADMINISTRATION & MANAGEMENT                                                                                                                                                                                                                                                                                                                                                                                                   |
|                                 |                                                                                                                                                                                                                                                                                                                                                                                                                                                                                                           |

SCHOLARONE™  
Manuscripts

# Understanding the needs and experiences of people with young onset dementia: a qualitative study

**Luisa I. Rabanal**

Salford Institute for Dementia  
University of Salford  
[l.rabanal@salford.ac.uk](mailto:l.rabanal@salford.ac.uk)  
Room 115, Crescent House  
University of Salford  
Salford M5 4WT

**Dr John Chatwin**

\*Corresponding author

Salford Institute for Dementia  
Room 115, Crescent House  
University of Salford  
Tel: +44 (0) 161 295 5526  
Fax: +44 (0) 161 295 5000  
[j.r.chatwin@salford.ac.uk](mailto:j.r.chatwin@salford.ac.uk)

**Mr Andy Walker**

Formerly Salford Institute for Dementia  
University of Salford  
[Andrew.Walker@srft.nhs.uk](mailto:Andrew.Walker@srft.nhs.uk)

**Dr Maria O'Sullivan**

Formerly Salford Institute for Dementia  
University of Salford  
[mariamosullivan@gmail.com](mailto:mariamosullivan@gmail.com)

**Dr Tracey Williamson**

Salford Institute for Dementia, School of Health and Society  
University of Salford  
[t.williamson@salford.ac.uk](mailto:t.williamson@salford.ac.uk)

**Word count:** 4880

## ABSTRACT

### Aim

Despite an estimated 40,000 people diagnosed with young onset dementia (YOD) in the UK, there is a general lack of awareness of the condition when compared with late onset dementia (LOD). The aim of this study was to explore the experiences and needs of people living with YOD (under 65 years), and gain an understanding of the issues that impact on them.

### Setting

Participants' homes, support group premises or university rooms.

### Participants

14 people with a diagnosis of YOD from a Northern UK city.

### Design

Semi-structured, in-depth interviews were audio recorded, transcribed and analysed cross-sectionally following principles of interpretative phenomenological analysis.

### Results

Three superordinate themes are reported on: 'process of diagnosis', 'the impact of living YOD' and 'needs of people with YOD'. Nine subordinate themes captured participant experiences of developing cognitive difficulties, being diagnosed with YOD, and subsequently living with the condition. Key issues emerging included: a lack of general awareness of YOD; how this can delay help seeking; commonalities in pre-diagnosis trajectories; retrospective understanding of pre-diagnosis symptom patterns; the difficulties of obtaining a firm diagnosis; the importance of face-to-face support; difficulties associated with daily living. Participants also described the emotional and psychological impact of the condition and the importance of formal and informal support networks.

### Conclusions

People who have a diagnosis of YOD regard themselves as distinct from older people with dementia. Despite similar symptoms, the context in which they experience the condition creates a range of distinct psycho-social concerns not commonly well addressed by health and social care services. As awareness of YOD continues to grow, the development (or adaptation) of services which take into account the idiosyncratic needs of people with YOD should be addressed.

### Strengths and limitations of the study

- The study utilises interpretative phenomenological analysis (IPA) to provide insights into the experiences of people living with YOD and the process of engaging with health and social support networks.
- Care was taken to sample a cadre with as wide a range of characteristics as possible, including gender and socio-demographic variations.

- The sample was relatively small and participants were drawn from a single region. The sample size is appropriate for an in-depth qualitative study of this nature.
- Some of the interviews were together with carers. This could potentially have impacted on what was reported by the person with YOD.

## Background

There are 850,000 people living with dementia in the UK (1). The condition is increasingly recognised as a serious health and social challenge because it not only affects the person with the illness, but also directly impacts on their family, their carers and their wider social circle. (2) In the UK, tackling with dementia is high on the health policy agenda, and there have been a series of initiatives since the launch of the National Dementia Strategy, (3) aimed at raising awareness of the condition and improving the care available. (4,5,6,7) Similarly, the challenges encountered by those who care for people with dementia – either on a formal or informal basis – are increasingly acknowledged. (8) There have been a number of studies, (9,10,11) and policy initiatives (12,13) focusing on this particular group.

Although dementia is often associated with ageing, it not only affects older adults. According to estimates based on expert opinion, in 2013 there were over 40,000 people in the UK living with dementia who were under 65 years of age (14). This estimate is still widely quoted, however the actual number of people who currently have YOD is unknown. Although there is now a 15 year history of studies focusing on people with young onset dementia (YOD) (15) they are still a relatively marginalised group, and largely absent from active involvement in the development of services. Cases of undiagnosed YOD are very common, with reports as high as 30-50% (16) and again, may be attributed partly to the general perception that dementia is a condition of old age (17). Younger people who develop the condition are likely to present with a wider variety of symptoms compared to those over 65 years, (18) and this too can complicate matters. Memory loss and cognitive impairments which are strongly associated with dementia may not be the main presenting problem for a younger person, and the sometimes ill-defined symptoms that characterise the initial stages of the condition are often ascribed to other conditions such as depression or stress. (19,15) People with frontotemporal dementia, for example, can initially present with personality changes as their primary symptom, and younger people may also have difficulties with visuospatial and semantic tasks. (20) Another reason why people with YOD are currently viewed as a marginalised population may relate to the psycho-social limitations that the condition can impose. (21) This often includes social isolation, (22) and fears of stigma (20). As a result of this the likelihood that a person will become engaged in public activism or campaigning is low. (23)

For people who receive a diagnosis of dementia at a relatively young age, the implications can be different from those who develop the condition in later years, beyond traditional retirement age. The implications can be particularly severe (24) with a person having YOD being more likely to still be in paid employment, and may have dependents including spouses, children and/or ageing parents to support. (15,22) Post-diagnosis, individuals can remain in relatively good physical health for many years, but the awareness of an inevitably accelerated mental deterioration, and the implications this will have, is in itself a source of great stress for both the person with the condition and those around them. (25) It can also be difficult for younger people to access appropriate community and residential

1  
2  
3 services because mainstream dementia care services are aimed primarily at older adults and are often  
4 not suitable to their requirements. (26) Furthermore, services for younger people with dementia are  
5 often overlooked in mental health strategies which tend to default to the needs of older adults and  
6 they are frequently excluded from working age mental health services, reinforcing dementia as an  
7 older person's illness. (27)  
8  
9

10 The aim of this study was to explore the experiences and needs of younger people living with  
11 dementia – to facilitate an understanding of the issues that impact on them, and to identify  
12 opportunities for the development of services that might be a better 'fit' with the unique context of  
13 their needs.  
14  
15

## 16 17 18 **Methods**

### 19 20 **Sample**

21 The sample comprised 14 people with YOD aged between 57-67 years. Age at diagnosis ranged from  
22 52-64 years. All had obtained their diagnosis before the age of 65. Of these, five interviews were  
23 paired (person with dementia and their carer) but the carer voices are not reported on here. In-depth  
24 analysis of data from a sample of this size is appropriate for IPA.  
25  
26

### 27 28 **Patient and public involvement**

29 Study participants were recruited from a number of YOD support organisations based in the North of  
30 England between February 2016 and April 2017. These were third sector organisations including a  
31 local group affiliated to Age UK, which supported around 50 people with YOD, and a not for profit  
32 community interest company providing person centred support to people living with dementia which  
33 currently dealt with over 200 referrals a year. Participants were also recruited from an NHS  
34 neurological unit which processed the majority of regional referrals for dementia assessment. All  
35 participants were given the opportunity to receive ongoing updates from the study, as well as any  
36 published outputs.  
37  
38

39  
40 Interviews took place at a time and place convenient to participants, usually their home or community  
41 support group premises. Written informed consent to audiotape interviews was obtained. The  
42 research team developed an interview topic guide in partnership with members of a dedicated study  
43 advisory group which comprised twelve people who were either living with YOD (seven) or were the  
44 carers of people living with YOD (five). The interview guide was further revised through the study's  
45 steering group which included representatives from service providing agencies, health practitioners  
46 specialising in dementia care and members of the research team. Interviews were semi-structured,  
47 narrative driven and explored issues including: participants' experiences of diagnosis; their trajectory  
48 of knowledge about the condition; use and experiences of statutory and non-statutory health and  
49 social care services; engagement with information resources and support organisations; and the  
50 impact of dementia on their daily lives.  
51  
52

53  
54 Interviews were conducted by LR and MO, elicited between 30 and 120 minutes of audio-recording  
55 each and were fully transcribed by an external transcription company. To ensure that the PWD had the  
56  
57

1  
2  
3 dominant voice during interviews that were conducted with carers present, questions were directed  
4 primarily at the PWD; the carer would interject if they felt they had extra information to support what  
5 the PWD was saying.  
6  
7

### 8 9 **Analysis**

10 In line with a growing number of other studies on the lived experience of dementia, interpretative  
11 phenomenological analysis (IPA) was applied. (28). IPA is an established method for researchers to  
12 explore the experience of individuals going through illness and the meanings people attach to those  
13 experiences. (29) IPA fosters the incorporation of individual perspectives, and the idiosyncratic  
14 meanings that participants attached to elements of their experience, which is particularly important  
15 given our limited knowledge of the experience of living with YOD. The relevance for using IPA with  
16 people with chronic illness has also been highlighted, as the approach accepts that participants are  
17 their own experts. (30) Analysis was undertaken by LR with independent verification of emergent  
18 themes with TW using a small subset of five transcripts.  
19  
20  
21

22 At a practical level, transcripts were first analysed individually and read several times while  
23 simultaneously listening to the audio-recording. The written content was formatted into a table to  
24 facilitate the annotation process. First, simple, descriptive comments were made while reading and  
25 listening to the transcript in order to reveal the content. The process was repeated a second and third  
26 time to note linguistic (use of language, laughter and voice tone) and conceptual (questions and  
27 interpretations of the text) comments respectively. The conceptual level of annotation is particularly  
28 important because it adds depth to the analysis. Various techniques were employed to search for  
29 connections across themes, on a case by case basis. These included abstraction (grouping similar  
30 themes), polarisation (focusing on differences between themes) and numeration (looking at  
31 frequencies of themes). The result was a list of superordinate themes and their respective subordinate  
32 themes for each participant.  
33  
34  
35  
36  
37  
38

### 39 **Results**

40 The analysis revealed four superordinate themes that represent prominent features of participants'  
41 stories collectively. The superordinate themes each comprise three subordinate themes (see Table 1)  
42 which vary in terms of their contribution from individual participants. In line with IPA philosophy,  
43 unique and common elements from the perspectives of participants are therefore represented. The  
44 more substantial superordinate Themes 1 to 3 are reported upon here: *the process of diagnosis; the*  
45 *impact of living with YOD; and the needs of people with YOD*. The less prominent theme 'living well  
46 with YOD' is shown in Table 1 for completeness but not reported on.  
47  
48  
49  
50

#### 51 **Insert Table 1 about here**

52  
53 Superordinate Theme 1: *The process of diagnosis*  
54  
55  
56  
57  
58  
59  
60

1  
2  
3 Participants talked extensively about how they received their diagnosis and the impact that this had on  
4 them, their families, and their wider social circle. The experience was characterised by a distinction  
5 between pre and post diagnostic phases. The pre-diagnosis phase was the period when the first subtle  
6 signs and changes in behaviour started to occur. It could be a particularly difficult and uncertain time  
7 for people who were still likely to be active, working and looking after dependents. It was usual for  
8 people who began to experience problems in carrying out their usual routines to battle to maintain  
9 control until a point of crisis forced them to seek help. The pre-diagnosis period was only really  
10 revealed and assimilated in hindsight, once a person could make retrospective connections between  
11 their gradually emerging symptoms – such as confusion and increasing memory problems – and their  
12 condition.  
13  
14  
15

16 A lack of awareness relating to YOD was reported by participants in the pre-diagnosis phase. In some  
17 cases, this had delayed the point at which they sought help. The interviewees gave a number of  
18 examples of signs and symptoms that were experienced during the early stages of their condition, but  
19 as these could occur in isolation, and were not always to do with memory issues, they were not  
20 immediately seen as indicators of a single underlying condition.  
21  
22

23 I found that my concentration wasn't the same. I could be stood cooking something and I'd  
24 go away and then I'd forget, until the smoke alarm was going off. . . I was decorating the  
25 bathroom at the time, I'd got the first piece of paper up then I couldn't fathom out how to  
26 match and I thought oh this isn't right . . . I could plug in the vacuum cleaner but I didn't  
27 know how to turn it on. (Participant 3)  
28  
29

30 I didn't think of it as an illness, I just thought I was having . . . but you know you just think  
31 the job is very stressful and you always have a, 'oh well, we were busy last night.'  
32 (Participant 4)  
33  
34

35 Even after people decided to seek help, it could be difficult to get a firm diagnosis, and there was often  
36 a reported struggle to be heard by health professionals:  
37  
38

39 The doctors and consultants were saying, 'no, you're too young to have dementia'. At this  
40 time I was about 49. So their thinking was it could be depression or stress because I was still  
41 working at this point. (Participant 1)  
42  
43

44 [Speaking about her GP] She put me on some tablet anyway, she said it was depression. . . I  
45 said to her, look it's getting that bad I'm looking after children, I can't do it. (Participant 3)  
46  
47

48 Participants had mixed views on the actual process of receiving a diagnosis. As with the process of  
49 being told about any life changing illness, interpersonal issues relating to the communication  
50 awareness and empathy of health care practitioners was important on an individual level. However,  
51 regardless of how the news was delivered, and the psychosocial support that may have been available,  
52 there was unanimity over the shock of actually receiving a diagnosis:  
53  
54

55 . . . and then they proceeded to tell me that I had Alzheimer's. At which point I just froze  
56 completely. (Participant 1)  
57  
58

1  
2  
3  
4 [They said] it's early onset Alzheimer's disease, just out of the blue like that. Well I was  
5 numb. (Participant 3)  
6

7 . . . it was awful. I felt like I was hit by a sledgehammer. . . I felt as though somebody had  
8 pulled the plug out of everything. (Participant 5)  
9

10  
11 At a practical level, a recurring issue was the amount of supporting documentation and information  
12 that participants were given at the point of diagnosis, and how this could be overwhelming.  
13

14 . . . and you're bombarded with, take this, take that, take this, take that. All these leaflets  
15 and basically all you want to do is sit down and think it through yourselves. (Participant 9)  
16

17  
18 I was given a pile of documents and I went home and put them in a cupboard. I have spoken  
19 to a number of people and it is a shared experience. It's all just too much to take on board  
20 and really, just a page would have done to point out the services. (Participant 10)  
21

22  
23 The predominance of leaflets as opposed to face-to-face support was also highlighted:  
24

25  
26 When I got home I was so angry, all the leaflets went straight in the bin. That was my way of  
27 thinking, I don't need the bloody leaflets, they don't mean anything to me. . . so yeah,  
28 leaflets weren't I mean for me. The thing that would have helped me most would've been for  
29 someone to be around outside my consultation room and approach me. Not approach my  
30 husband, but approach me maybe. I don't know, maybe offered me somewhere on my own  
31 rather than me going out in a big black cloud into nothingness. (Participant 1)  
32

33  
34 Some participants felt that post-diagnosis support was lacking. One acknowledged that she was coping  
35 with the help of her husband, but would have appreciated an occasional offer of support:  
36

37 . . . maybe every six to twelve months to say, 'we're here!' Particularly some emotional  
38 support. So I'd like somebody, not to take it out on, you know, somebody to talk to.  
39 (Participant 9)  
40

41  
42 A similar lack of agency was acknowledged by another participant:  
43

44  
45 Nobody says, you know, 'how does that make you feel?' In my view there still isn't any  
46 opportunity, three years down the line and I still haven't been able to voice how it made me  
47 feel then, how I felt coping with it for the last couple of years and how my feelings are  
48 towards the future. (Participant 1)  
49

50  
51  
52 Superordinate Theme 2: *The impact of living with YOD*  
53

54 The impact that dementia had on participants are grouped here into two main areas: *changes in*  
55 *function and daily living, and emotional and psychological impact.*  
56



#### *Changes in function and daily living*

The impacts on function were wide-ranging. Again, this was not always the direct result of memory loss per se. For example, participants described problems with everyday activities such as dealing with money:

I can't count money; I haven't yet worked that one out. (Participant 2)

Sometimes I don't carry money anymore because I could fumble with it. When I used to go and pay, I couldn't count the change out. (Participant 3)

I was going to the bank, put my card in to get some money out, and I took the card out and left the money. (Participant 7)

I would, for example, go for my lunch or go into a shop and if they said that something was 35 pence and I took the change out of my pocket, I couldn't count it. (Participant 10)

Communication issues, including the inability to maintain concentration during conversations and losing the thread during interaction were highlighted. Frequently reported was an increasing difficulty in 'finding the right word', and other more individualistic effects such as difficulty in recognising faces, pronunciation and speech production. There were less obvious problems too, such as only being able to concentrate on thinking about one thing at a time, which could have a broad impact on many aspects of daily life. Participants 4, 12 and 13, described noticing themselves becoming uncharacteristically confused and forgetful at work:

Well in my job [nursing] I was forgetting a lot of things, which I hadn't done before. I was a perfectionist in my job and I was then forgetting, not forgetting how to do things but – yes, I suppose, in a way. What was happening was I was forgetting parts of what I was doing. . . One night I came back and they said, 'oh, how was such and such a body?' And I went, 'oh, I can't remember what I gave him.' So they were all going round and asking was it this? Was it that? And we have got like 12 of us in the office and they are all shouting out 'oh, is it this or is it that?' And then all of a sudden somebody said the word and I went 'Yes! That's what I've done, that's it' And I got a round of applause. . . (Participant 4)

And actually, I think that was the time when I really thought, maybe I have got something. But I wrote the bloody thing and I couldn't remember it. (Participant 12)

I absolutely loved my job and then it just, I started, I realised that it was, I would come in the following day and couldn't remember what I'd worked on the night before. (Participant 13)

#### *Emotional and psychological impact*

Participants described their struggles and fears around living with dementia. These included uncertainty for the future and concerns about putting themselves at risk while struggling to maintain an image of themselves as 'normal' members of the community. A sense of trying to cover things up, and keep the realities of the condition hidden was evident:

1  
2  
3  
4 I cover up a lot. . . If I'm in a doctor's surgery I will get a magazine and flip through it. I can  
5 read the words but it doesn't make sense what's there. I don't understand what I'm reading  
6 but I wouldn't give people the satisfaction of thinking. . . To them they probably just think I'm  
7 reading. So really you mask a lot of things just to try and still fit in with society so you're not,  
8 like, different. (Participant 3)  
9

10  
11 You know you sort of live a double life almost. You know, you're sort of, 'yeah I'm fine, I'm  
12 fine.' But underneath you're thinking well am I going to see my grandkids grow up?  
13 (Participant 1)  
14

15 The importance of work, not only as a source of income but also of identity, was highlighted by  
16 participants. Also what was striking was the deep sense of loss that could occur when people  
17 were forced to stop working because of their cognitive difficulties – even if YOD had not yet been  
18 formally diagnosed. Eight of the interviewees with YOD were in paid employment at the time of  
19 their diagnosis.  
20

21  
22 I had to give up work and that was devastating, being a carer. When I realised that my clients  
23 were in danger, I thought I can't carry on with my job. (Participant 1)  
24  
25  
26  
27

28 [In a hospital] you see, if you are making a mistake, somebody is going to get hurt. That was  
29 the problem. That's why, when I went to see them, they told me I couldn't work anymore.  
30 (Participant 4)  
31  
32

### 33 Superordinate Theme 3: *The needs of people with YOD*

34

35 The majority of participants felt that the support of their family, friends and other people living with  
36 dementia was crucial. Those who did not have spouses often had a key person, possibly a close friend  
37 or child, who provided emotional and practical support:  
38  
39

40 [Talking about her daughter] She has gone through a lot with me in the last 12 months. . .  
41 and we have good communication, she can read me, she knows when I walk through that  
42 door in the morning, she knows if it's a good or bad day. (Participant 6)  
43  
44

45 Dementia-specific community groups were also seen as a significant source of support, and the  
46 importance of being able to relate to other people who had been, or were currently going through, a  
47 similar experience was highlighted:  
48  
49

50 . . . because there is nothing like having somebody who has got the same problem telling  
51 you how to cope with it, you know. Because you have been there, you have done it and you  
52 have got the t-shirt. I found [name of a high-profile UK dementia activist] was the best  
53 ambassador for it, because I looked at him and I thought, that's how I want to be in seven  
54 or eight years. (Participant 4)  
55  
56  
57  
58  
59  
60

1  
2  
3 I find that I am getting more support through people from the groups. (Participant 8)  
4

5 However, participants reported that it was important for the support they were offered to take into  
6 account that they may have different needs and interests to older people with dementia. Support  
7 groups that were specifically organised for people with YOD, rather than dementia in general were  
8 praised because they offered age-appropriate activities and – at their best – helped to develop a sense  
9 of independence and empowerment.  
10

11  
12 I think people of my own age, if they set up a group for them. Because we are probably a bit  
13 more able minded to do things, our faculties are probably a little bit better than maybe the  
14 older ones are. . . . because everything at the moment is based on older people. . . it's like  
15 being in school and it's all old war songs. Well I wasn't even born in the war. (Participant 3)  
16  
17

18 There was also a strong sense that any new initiatives need to acknowledge that not everybody will  
19 wish to engage with 'traditional' dementia support group formats – singing groups, reminiscence  
20 groups and so on. Again, this was largely because of the perception that these groups catered mainly  
21 for older people. Participants, who were still living independently, expressed a need for a less formal  
22 approach in how dementia group sessions were booked and arranged:  
23  
24

25  
26 [If] you have a singing group for dementia, why do I have to make an appointment? Surely I  
27 should be able to just walk through the door and go 'hello, I am such a body, I've got young  
28 onset dementia, can I see what you're about please?' I shouldn't have to phone up and  
29 have to book in. . . It's the way they run their groups, this phone up and book in. Sorry, but  
30 how can anyone with dementia, unless they've got a carer, remember to phone up and  
31 book a spot? (Participant 6)  
32  
33

## 34 35 Discussion

36 Although our sample was relatively small, for an in-depth qualitative study of this nature it was entirely  
37 adequate. Participants described in detail their particular experiences of receiving a diagnosis of  
38 dementia at a relatively young age, and coming to terms with the situation they found themselves in.  
39 Currently, although medical and lay awareness about dementia issues in general is on the ascendant,  
40 (31) and the idiosyncratic collection of psycho-social issues that it engenders, remain at the margins of  
41 public awareness. (32) People who are formally diagnosed can find themselves in a position where, for  
42 the purposes of many health and social support interventions, their needs are aggregated with those  
43 of people who develop dementia much later in life. On one level this may not appear to be a significant  
44 issue; functionally, the symptoms exhibited by both cohorts will be similar, and so too will be the  
45 choice of treatments and therapies available. (33) For many people with YOD, however, there are likely  
46 to be a whole raft of tangential - often age related - psycho-social issues, such as still being in  
47 employment or in a spousal relationship, that have a profound impact on the way in which they come  
48 to terms with their condition and whether or not they develop effective ways of living with it.  
49  
50  
51  
52  
53

54 The findings from this study concur with other work which has highlighted that people with YOD face a  
55 range of specific difficulties that do not necessarily impact on older people to the same degree. (34,35)  
56 The often lengthy period leading up to the point at which a person recognises that they need to seek  
57

1  
2  
3 help is the first of these. In line with other studies, (36,37) for a number of our participants, the initial  
4 signs that something was wrong were not directly related to memory problems, but to wider and more  
5 general cognitive anomalies or behavioural changes, with eight participants first noticing problems  
6 whilst at work. Basic memory issues such as increasing forgetfulness could be a significant element,  
7 but might well only have been one of a variety of sporadic perturbations in spatial awareness or  
8 episodes of general confusion. Again, with an older person, the onset of such symptoms might readily  
9 indicate the onset of dementia. But with younger people, connections are often not made until much  
10 further on in the disease process. (38) In line with studies on self-identity and illness, (39,40) people  
11 may attribute these kinds of symptomatic patterns to work stress or other causes such as depression.  
12  
13 (41)  
14  
15

16 It was evident that the process of receiving and accepting a diagnosis of YOD was extremely difficult  
17 for most people. At an interactional level there have been few recommendations relating to how  
18 health professionals might better adapt their approach to delivering a diagnosis – one that might, for  
19 example, more readily take into account the perspective of the younger person. Furthermore,  
20 although there have been significant improvements in the provision of relevant health and support  
21 information in recent years, (24) this in itself appears to be causing some problems, not least that the  
22 major part of it is still skewed towards older patients and their carers. As has been suggested in studies  
23 on information provision for other serious conditions (42,43) people in this study reported feeling  
24 overwhelmed at the point of diagnosis by the sheer amount of material they were given, to the point  
25 where they simply disengaged with it. For a condition that can place such restrictions on cognitive  
26 processes, more effective and streamlined ways of delivering information tailored specifically for those  
27 with YOD need to be devised.  
28  
29  
30

31 Unlike those who develop dementia after they reach traditional retirement age, people with YOD will  
32 commonly be in employment or eligible for employment at diagnosis. Having to give up work or the  
33 prospect of preferred work, and the severe implications this has on many levels, was a recurring  
34 theme. Ironically, still being engaged in a work environment and being in a position where subtle  
35 changes in behaviour and cognitive ability might be more readily noticed – both by the person  
36 themselves and also by their co-workers – could be a significant trigger in prompting people to seek  
37 help. Occasionally this decision may be forced upon them, particularly if they work in a field where  
38 their ability and actions could be a danger to others, such as healthcare, making the experience  
39 particularly difficult.  
40  
41  
42  
43

44 Study participants were clear about the importance they placed on family, friends and peers (other  
45 people living with dementia) as a source of support, at both a psychological and practical level. The  
46 study suggests, however, that as with information provision and care pathway engagement, attitudes  
47 towards formal and informal support groups can be ambiguous. While efforts to provide such support  
48 were universally appreciated, there was a definite sense that the traditional forms of dementia  
49 focused support group do not always follow formats, or offer activities that younger people wish to  
50 engage with. More passive reminiscence based activities, for example, that are very common in care  
51 homes and other environments that support older people with dementia, are often focused on periods  
52 before some people with YOD were born, and may not resonate well with them.  
53  
54  
55  
56  
57  
58  
59  
60

## Conclusions

This study used innovative participatory methods and built on existing work in this area by examining post-diagnostic support in a region with relevant service provision for YOD. Participants gave detailed accounts of their needs and experiences relating to living with YOD and described a wide range of issues that affected them. Our findings are largely in line with other studies that have begun to focus on this group, (15) and confirms that those who have a diagnosis of YOD see themselves as distinct from older people with the condition – even if they experience similar symptoms. We show that peer support is crucial for people living with YOD, as is the need for them to engage in YOD-specific groups with age-appropriate activities.

There have been significant positive developments at both a national and local level in the re-positioning of care pathways and social support for people with dementia (5,6). In parallel with these there have also been a number of high profile dementia focused initiatives that set out to actively address the needs of people with YOD as well as older people. Two prime examples are *Dementia Friendly Communities* run by the Alzheimer's Society, (44) and the *Dementia Engagement and Empowerment Project (DEEP)*, (45) which aims to bring together groups of people with dementia from across the UK and support attempts to improve services. As awareness of YOD continues to grow, the development (or adaptation) of support services such as these which take into account the particular requirements of this younger group need to be maintained. Although the number of people with YOD is admittedly extremely small when compared with the number of older people with dementia, there is potential for incremental (and inexpensive) adjustments to existing health and social care interventions which could make a significant difference to their ability to live independently, with good quality of life, for as long as possible.

### Funding.

This work was supported by a project grant from The Booth Charities, Salford, UK. The full title of the study was: '*Living well with young onset dementia - Humphrey Booth Resource Centre as a hub of excellence in a system of support.*'

### Competing interests.

None

### Ethical review.

Approval for the study was obtained from the Health Research Authority – Preston Research Ethics Committee. (REC Reference Number: 15/NW/0921.)

### Author contributions:

JC led on the writing and participated in the analysis. LR gathered the data, led the analysis and participated in the writing. TW conceived the research idea and study design, and participated in the analysis and writing. MO undertook some interviews and analysis, and writing. AW contributed to writing. All authors commented on and approved the final version of the manuscript.

**Acknowledgements:**

We would like to thank all of the participants in the study for sharing their experiences and all members of the study advisory and steering groups.

**Data Sharing:**

No additional data are available.

**References**

- 1 Alzheimer's Research. Alzheimer's Society 2017. London.
- 2 De Waal H, Lyketsos C, Ames D, O'Brien J. Designing and Delivering Dementia Services. Cambridge. Wiley Blackwell. 2013.
- 3 Department of Health. The National Dementia Strategy London. Crown Copyright. (2009)
- 4 Public Health England. Dementia: Applying all our Health. London. Crown Copyright. (2017)
- 5 Department of Health. Making a Difference in Dementia: Nursing Vision and Strategy. London. Crown Copyright. (2016)
- 6 Department of Health. Living well with Dementia: a national Dementia Strategy. London. Crown Copyright. (2011)
- 7 Department of Health. Prime Minister's Challenge on Dementia: Delivering Major Improvements in Dementia Care by 2015. London. Crown Copyright (2012)
- 8 National Institute for Health and Clinical Excellence and the Social Care Institute for Excellence. Dementia: The NICE-SCIE Guideline on Supporting People with Dementia and their Carers in Health and Social Care – Amended to Include Guideline 421. London. Crown Copyright. (2011)
- 9 Donnellan W J, Bennett K M, Soulsby L K. Family close but friends closer: exploring social support and resilience in older spousal dementia carers. *Aging & Mental Health* 2017;21.11:1222-1228.
- 10 O'Dwyer S T, Moyle W, Zimmer-Gembeck M, De Leo D. Suicidal ideation in family carers of people with dementia. *Aging & Mental Health*. 2016;20.2:222-230.
- 11 Peel E, Harding R. 'It's a huge maze, the system, it's a terrible maze': Dementia carers' constructions of navigating health and social care services. *Dementia*. 2014;13.5:642-661.
- 12 Public Health England. Dementia and housing: an assessment tool for local commissioning. London. Crown Copyright. (2016)
- 13 Department of Health. Post-legislative assessment of the Health and Social Care Act 2008

1  
2  
3 Memorandum to the House of Commons Health Select Committee. London. Crown Copyright. (2013).  
4

5 14 Alzheimer's Research. Alzheimer's Society 2017. London.  
6

7 15 Mayrhofer A, Mathie E, McKeown J, Bunn F, Goodman C. Age-appropriate services for people  
8 diagnosed with young onset dementia (YOD): a systematic review. *Aging & Mental Health*. 2017 Jun  
9 1:1-9.  
10

11 16 Bentham P, La Fontaine J. Services for younger people with dementia. *Psychiatry*. 2008;7.2:84-87  
12

13 17 Werner P, Stein-Shvachman I, Korczyn A D. Early onset dementia: *clinical and social aspects*.  
14 *International Psychogeriatrics*. 2009;21.4:631-636.  
15

16 18 Pipon-Young F E, Lee K M, Jones F, Guss R. I'm not all gone, I can still speak: The experiences of  
17 younger people with dementia. An action research study. *Dementia*. 2012;11.5:596-616.  
18

19 19 Harris P B, Keady J. Selfhood in younger onset dementia: transitions and testimonies. *Aging and*  
20 *Mental Health*. 2009;13.3:437-444.  
21

22 20 Roach P, Keady J, Bee P, Hope P. Subjective experiences of younger people with dementia and  
23 their families: implications for UK research, policy and practice. *Reviews in Clinical Gerontology*.  
24 2008;18.2:165-174  
25

26 21 Luscombe G, Brodaty H, Freeth S. Younger people with dementia: diagnostic issues, effects on  
27 carers and use of services. *International Journal of Geriatric Psychiatry*. 1998;13.5:323-330.  
28

29 22 Beattie A, Daker-White G, Gilliard J, Means R. 'How can they tell?' A qualitative study of the views  
30 of younger people about their dementia and dementia care services. *Health & Social Care in the*  
31 *Community*. 2014;12.4:359-368.  
32

33 23 Harris P B, Keady J. Selfhood in younger onset dementia: transitions and testimonies. *Aging and*  
34 *Mental Health*. 2009;13.3:437-444.  
35

36 24 Rayment D, Kuruvilla T. Service Provision for Young-Onset Dementia in the UK. *Progress in*  
37 *Neurology and Psychiatry*. 2015:28-30  
38

39 25 Kaiser S, Panegyres P K. The psychosocial impact of young onset dementia on spouses. *American*  
40 *Journal of Alzheimer's Disease & Other Dementias*. 2007;21.6:398-402.  
41

42 26 Withall A. The Challenges of Service Provision in Younger-Onset Dementia. *Journal of the American*  
43 *Medical Directors Association*. 2013:230-232.  
44

45 27 Connolly P, Perea N. *Developing an Ideal Old Age Service*. Royal College of Psychiatrists 2013.  
46 London.  
47

48 28 Clemerson G, Walsh S, Issac C. Towards living well with young onset dementia: an exploration of  
49 coping from the perspective of those diagnosed. *Dementia*. 2013;13.4:451-466  
50

51 29 Smith J A, Flowers P, Larkin M. *Interpretative Phenomenological Analysis*. London. Sage  
52 Publications Ltd. 2009  
53

54 30 Cronin-Davis J, Butler A, Mayers C A. Occupational therapy and interpretative phenomenological  
55 analysis: comparable research companions? *British Journal of Occupational Therapy*. 2009;72.8:332 –  
56 338.  
57  
58  
59  
60

- 1  
2  
3 31 Ahmad S, Orrell M, Iliffe S, Gracie A. GPs' attitudes, awareness, and practice regarding early  
4 diagnosis of dementia. *Br J Gen Pract*. 2010; 60:578: 360-e365.
- 5  
6 32 Page S, Keady, J. Sharing stories: a meta-ethnographic analysis of 12 autobiographies written by  
7 people with dementia between 1989 and 2007. *Ageing & Society*. 2010;30.3:511-526.
- 8  
9 33 McMurtray A, Clark D G, Christine D, Mendez M F. Early-onset dementia: frequency and causes  
10 compared to late-onset dementia. *Dementia and Geriatric Cognitive Disorders*. 2006;21.2:59-64.
- 11  
12 34 Baptista M A T, Santos R L, Kimura N, Lacerda I B, Johannessen A, Barca M L, Engedal K, Dourado  
13 M C N. Quality of life in young onset dementia: an updated systematic review. *Trends in Psychiatry and  
14 Psychotherapy*. 2016; 38.1:6-13.
- 15  
16 35 Svanberg E, Spector A, Stott, J. The impact of young onset dementia on the family: a literature  
17 review. *International Psychogeriatrics*. 2011;23.3:356-371.
- 18  
19 36 Van Vliet D, Persoon A, Bakker C, Koopmans R T, de Vugt M E, Bielderma A, Gerritsen D L. Feeling  
20 useful and engaged in daily life: exploring the experiences of people with young-onset dementia.  
21 *International Psychogeriatrics*. 2017:1-10.
- 22  
23 37 Draper B, Cations M, White F, Trollor J, Loy C, Brodaty H, Sachdev P, Gonski P, Demirkol A,  
24 Cumming R G, Withall A. Time to diagnosis in young-onset dementia and its determinants: the  
25 INSPIRED study. *International journal of geriatric psychiatry*. 2016;31.11:1217-1224.
- 26  
27 38 Van Vliet D, de Vugt M E, Bakker C, Pijnenburg Y A L, Vernooij-Dassen M J F J, Koopmans R T C M,  
28 Verhey F R J. Time to diagnosis in young-onset dementia as compared with late-onset dementia.  
29 *Psychological Medicine*. 2013;43.2:423-432.
- 30  
31 39 Thoits P A. Self, identity, stress, and mental health. In *Handbook of the sociology of mental health*.  
32 Netherlands. Springer. 2013: 357-377
- 33  
34 40 Caddell L S, Clare L. The impact of dementia on self and identity: A systematic review. *Clinical  
35 Psychology Review*. 2010; 30.1:113-126.
- 36  
37 41 Mendez M F. The accurate diagnosis of early-onset dementia. *The International Journal of  
38 Psychiatry in Medicine*. 2006;36.4:401-412.
- 39  
40 42 Harding R, Selman L, Beynon T, Hodson F, Coady E, Read C, Walton M, Gibbs L, Higginson I J.  
41 Meeting the communication and information needs of chronic heart failure patients. *Journal of Pain  
42 and Symptom Management*. 2008;36.2:149-156.
- 43  
44 43 Cox A, Jenkins V, Catt S, Langridge C, Fallowfield L. Information needs and experiences: an audit of  
45 UK cancer patients. *European Journal of Oncology Nursing*. 2006;10.4:263-272.
- 46  
47 44 [https://www.alzheimers.org.uk/info/20079/dementia\\_friendly\\_communities](https://www.alzheimers.org.uk/info/20079/dementia_friendly_communities)
- 48  
49 45 <http://dementivoices.org.uk>
- 50  
51  
52  
53  
54  
55  
56  
57  
58  
59  
60



**Superordinate theme****Subordinate theme****Key words and issues**

|                                                      |                                          |                                                                                                    |
|------------------------------------------------------|------------------------------------------|----------------------------------------------------------------------------------------------------|
| <b>1. Process of diagnosis</b>                       | <i>Pre-diagnosis</i>                     | Warning signs, alarm bells, too young                                                              |
|                                                      | <i>'Hit by a sledge hammer'</i>          | Sledgehammer, shock, lack of support, information overload                                         |
|                                                      | <i>Post-diagnosis</i>                    | Benefits, no follow up, looking for answers                                                        |
| <b>2. Impact of living with young onset dementia</b> | <i>Impact on behavior &amp; function</i> | Activities of daily living, money, cooking, communication, uncharacteristic behavior, loss of self |
|                                                      | <i>Psychological impact</i>              | Fear of the future, covering up, living a double life                                              |
|                                                      | <i>Impact on work</i>                    | Devastation, loss, forgetting things                                                               |

1  
2  
3 **3. Needs of people with young**  
4 **onset dementia**

5  
6  
7  
8  
9  
10  
11  
12  
13  
14  
15  
16  
17  
18  
19  
20  
21  
22  
23  
24  
25  
26  
27  
28  
29  
30  
31  
32  
33  
34  
35  
36  
37  
38  
39  
40  
41  
42  
43  
44  
45  
46  
47  
48  
49  
50  
51  
52  
53  
54  
55  
56  
57  
58  
59  
60

*'They are my rock'*

Support, friends and family, spouse

*What helps?*

Peer support, post-diagnostic support groups.

*What could be improved?*

Raising dementia awareness, it's more than just memory, dementia groups

**4. Living well with young onset dementia**

**\* not reported on here**

*Psychological coping strategies*

Positivity, optimism

*Practical coping strategies*

Simple things, routine, familiarity

*'Trying to keep occupied'*

Therapeutic benefits of activity

*Table 1: Superordinate and subordinate themes from IPA analysis of all participants living with young onset dementia*

# Standards for Reporting Qualitative Research (SRQR)\*

<http://www.equator-network.org/reporting-guidelines/srqr/>

Page/line no(s).

## Title and abstract

|                                                                                                                                                                                                                                                              |        |
|--------------------------------------------------------------------------------------------------------------------------------------------------------------------------------------------------------------------------------------------------------------|--------|
| <p><b>Title</b> - Concise description of the nature and topic of the study Identifying the study as qualitative or indicating the approach (e.g., ethnography, grounded theory) or data collection methods (e.g., interview, focus group) is recommended</p> | Page 1 |
| <p><b>Abstract</b> - Summary of key elements of the study using the abstract format of the intended publication; typically includes background, purpose, methods, results, and conclusions</p>                                                               | Page 2 |

## Introduction

|                                                                                                                                                                     |                                                                    |
|---------------------------------------------------------------------------------------------------------------------------------------------------------------------|--------------------------------------------------------------------|
| <p><b>Problem formulation</b> - Description and significance of the problem/phenomenon studied; review of relevant theory and empirical work; problem statement</p> | Page 3 (last para) page 4 (1 <sup>st</sup> / 2 <sup>nd</sup> para) |
| <p><b>Purpose or research question</b> - Purpose of the study and specific objectives or questions</p>                                                              |                                                                    |

## Methods

|                                                                                                                                                                                                                                                                                                                                                                                                             |                                                  |
|-------------------------------------------------------------------------------------------------------------------------------------------------------------------------------------------------------------------------------------------------------------------------------------------------------------------------------------------------------------------------------------------------------------|--------------------------------------------------|
| <p><b>Qualitative approach and research paradigm</b> - Qualitative approach (e.g., ethnography, grounded theory, case study, phenomenology, narrative research) and guiding theory if appropriate; identifying the research paradigm (e.g., postpositivist, constructivist/ interpretivist) is also recommended; rationale**</p>                                                                            | Page 4 (last para) page 5 (1 <sup>st</sup> para) |
| <p><b>Researcher characteristics and reflexivity</b> - Researchers' characteristics that may influence the research, including personal attributes, qualifications/experience, relationship with participants, assumptions, and/or presuppositions; potential or actual interaction between researchers' characteristics and the research questions, approach, methods, results, and/or transferability</p> | Page 5 (3 <sup>rd</sup> para)                    |
| <p><b>Context</b> - Setting/site and salient contextual factors; rationale**</p>                                                                                                                                                                                                                                                                                                                            | Page 4 (3 <sup>rd</sup> para)                    |
| <p><b>Sampling strategy</b> - How and why research participants, documents, or events were selected; criteria for deciding when no further sampling was necessary (e.g., sampling saturation); rationale**</p>                                                                                                                                                                                              | Page 4 (3 <sup>rd</sup> / 4 <sup>th</sup> paras) |
| <p><b>Ethical issues pertaining to human subjects</b> - Documentation of approval by an appropriate ethics review board and participant consent, or explanation for lack thereof; other confidentiality and data security issues</p>                                                                                                                                                                        | Page 12('Ethical review')                        |
| <p><b>Data collection methods</b> - Types of data collected; details of data collection procedures including (as appropriate) start and stop dates of data collection and analysis, iterative process, triangulation of sources/methods, and modification of procedures in response to evolving study findings; rationale**</p>                                                                             | Page 4 (primarily last para)                     |

|                       |                                                                                                                                                                                                                                                       |                                      |
|-----------------------|-------------------------------------------------------------------------------------------------------------------------------------------------------------------------------------------------------------------------------------------------------|--------------------------------------|
| 1<br>2<br>3<br>4<br>5 | <b>Data collection instruments and technologies</b> - Description of instruments (e.g., interview guides, questionnaires) and devices (e.g., audio recorders) used for data collection; if/how the instrument(s) changed over the course of the study | Page 4 (last para) Page 16 (table 1) |
| 6<br>7<br>8           | <b>Units of study</b> - Number and relevant characteristics of participants, documents, or events included in the study; level of participation (could be reported in results)                                                                        | Page 4 (4 <sup>th</sup> para)        |
| 9<br>10<br>11<br>12   | <b>Data processing</b> - Methods for processing data prior to and during analysis, including transcription, data entry, data management and security, verification of data integrity, data coding, and anonymization/de-identification of excerpts    | Page 4 (last para)                   |
| 13<br>14<br>15<br>16  | <b>Data analysis</b> - Process by which inferences, themes, etc., were identified and developed, including the researchers involved in data analysis; usually references a specific paradigm or approach; rationale**                                 | Page 5 (1 <sup>st</sup> para)        |
| 17<br>18<br>19<br>20  | <b>Techniques to enhance trustworthiness</b> - Techniques to enhance trustworthiness and credibility of data analysis (e.g., member checking, audit trail, triangulation); rationale**                                                                | Page 5 (2 <sup>nd</sup> para)        |

## Results/findings

|                      |                                                                                                                                                                                                   |                    |
|----------------------|---------------------------------------------------------------------------------------------------------------------------------------------------------------------------------------------------|--------------------|
| 23<br>24<br>25<br>26 | <b>Synthesis and interpretation</b> - Main findings (e.g., interpretations, inferences, and themes); might include development of a theory or model, or integration with prior research or theory | Pages 5 to page 10 |
| 27<br>28<br>29       | <b>Links to empirical data</b> - Evidence (e.g., quotes, field notes, text excerpts, photographs) to substantiate analytic findings                                                               | As above           |

## Discussion

|                                  |                                                                                                                                                                                                                                                                                                                                                                                                             |                |
|----------------------------------|-------------------------------------------------------------------------------------------------------------------------------------------------------------------------------------------------------------------------------------------------------------------------------------------------------------------------------------------------------------------------------------------------------------|----------------|
| 32<br>33<br>34<br>35<br>36<br>37 | <b>Integration with prior work, implications, transferability, and contribution(s) to the field</b> - Short summary of main findings; explanation of how findings and conclusions connect to, support, elaborate on, or challenge conclusions of earlier scholarship; discussion of scope of application/generalizability; identification of unique contribution(s) to scholarship in a discipline or field | Pages 10 to 11 |
| 38<br>39                         | <b>Limitations</b> - Trustworthiness and limitations of findings                                                                                                                                                                                                                                                                                                                                            | Page 2         |

## Other

|                |                                                                                                                                               |                               |
|----------------|-----------------------------------------------------------------------------------------------------------------------------------------------|-------------------------------|
| 42<br>43<br>44 | <b>Conflicts of interest</b> - Potential sources of influence or perceived influence on study conduct and conclusions; how these were managed | None (page 12)                |
| 45<br>46<br>47 | <b>Funding</b> - Sources of funding and other support; role of funders in data collection, interpretation, and reporting                      | Funder Acknowledged (page 12) |

\*The authors created the SRQR by searching the literature to identify guidelines, reporting standards, and critical appraisal criteria for qualitative research; reviewing the reference lists of retrieved sources; and contacting experts to gain feedback. The SRQR aims to improve the transparency of all aspects of qualitative research by providing clear standards for reporting qualitative research.

1  
2  
3  
4  
5  
6  
7  
8  
9  
10  
11  
12  
13  
14  
15  
16  
17  
18  
19  
20  
21  
22  
23  
24  
25  
26  
27  
28  
29  
30  
31  
32  
33  
34  
35  
36  
37  
38  
39  
40  
41  
42  
43  
44  
45  
46  
47  
48  
49  
50  
51  
52  
53  
54  
55  
56  
57  
58  
59  
60

\*\*The rationale should briefly discuss the justification for choosing that theory, approach, method, or technique rather than other options available, the assumptions and limitations implicit in those choices, and how those choices influence study conclusions and transferability. As appropriate, the rationale for several items might be discussed together.

**Reference:**

O'Brien BC, Harris IB, Beckman TJ, Reed DA, Cook DA. **Standards for reporting qualitative research: a synthesis of recommendations.** *Academic Medicine*, Vol. 89, No. 9 / Sept 2014  
DOI: 10.1097/ACM.0000000000000388

For peer review only

# BMJ Open

## Understanding the needs and experiences of people with young onset dementia: a qualitative study

|                                 |                                                                                                                                                                                                                                                                                                                                                                                                                                                                                                           |
|---------------------------------|-----------------------------------------------------------------------------------------------------------------------------------------------------------------------------------------------------------------------------------------------------------------------------------------------------------------------------------------------------------------------------------------------------------------------------------------------------------------------------------------------------------|
| Journal:                        | <i>BMJ Open</i>                                                                                                                                                                                                                                                                                                                                                                                                                                                                                           |
| Manuscript ID                   | bmjopen-2017-021166.R2                                                                                                                                                                                                                                                                                                                                                                                                                                                                                    |
| Article Type:                   | Research                                                                                                                                                                                                                                                                                                                                                                                                                                                                                                  |
| Date Submitted by the Author:   | 27-Jun-2018                                                                                                                                                                                                                                                                                                                                                                                                                                                                                               |
| Complete List of Authors:       | Rabanal , Luisa ; University of Salford, Institute for Dementia, School of Health and Society<br>Chatwin, John; University of Salford, Institute for Dementia, School of Health and Society<br>Walker, Andy ; University of Salford, Institute for Dementia, School of Health and Society<br>O'Sullivan, Maria O'Sullivan; University of Salford, Institute for Dementia, School of Health and Society<br>Williamson, Tracey; University of Salford, Institute for Dementia, School of Health and Society |
| <b>Primary Subject Heading</b>: | Qualitative research                                                                                                                                                                                                                                                                                                                                                                                                                                                                                      |
| Secondary Subject Heading:      | Public health, Patient-centred medicine                                                                                                                                                                                                                                                                                                                                                                                                                                                                   |
| Keywords:                       | Young onset dementia, Dementia < NEUROLOGY, Health policy < HEALTH SERVICES ADMINISTRATION & MANAGEMENT                                                                                                                                                                                                                                                                                                                                                                                                   |
|                                 |                                                                                                                                                                                                                                                                                                                                                                                                                                                                                                           |

SCHOLARONE™  
Manuscripts

# Understanding the needs and experiences of people with young onset dementia: a qualitative study

**Luisa I. Rabanal**

Salford Institute for Dementia  
University of Salford  
[l.rabanal@salford.ac.uk](mailto:l.rabanal@salford.ac.uk)  
Room 115, Crescent House  
University of Salford  
Salford M5 4WT

**Dr John Chatwin**

\*Corresponding author

Salford Institute for Dementia  
Room 115, Crescent House  
University of Salford  
Tel: +44 (0) 161 295 5526  
Fax: +44 (0) 161 295 5000  
[j.r.chatwin@salford.ac.uk](mailto:j.r.chatwin@salford.ac.uk)

**Mr Andy Walker**

Formerly Salford Institute for Dementia  
University of Salford  
[Andrew.Walker@srft.nhs.uk](mailto:Andrew.Walker@srft.nhs.uk)

**Dr Maria O'Sullivan**

Formerly Salford Institute for Dementia  
University of Salford  
[mariamosullivan@gmail.com](mailto:mariamosullivan@gmail.com)

**Dr Tracey Williamson**

Salford Institute for Dementia, School of Health and Society  
University of Salford  
[t.williamson@salford.ac.uk](mailto:t.williamson@salford.ac.uk)

**Word count:** 4880

## ABSTRACT

### Aim

Despite an estimated 40,000 people diagnosed with young onset dementia (YOD) in the UK, there is a general lack of awareness of the condition when compared with late onset dementia (LOD). The aim of this study was to explore the experiences and needs of people living with YOD (under 65 years) and gain an understanding of the issues that impact on them.

### Setting

Participants' homes, support group premises or university rooms.

### Participants

14 people with a diagnosis of YOD from a Northern UK city.

### Design

Semi-structured, in-depth interviews were audio recorded, transcribed and analysed cross-sectionally following principles of interpretative phenomenological analysis.

### Results

Four superordinate themes are reported on: 'process of diagnosis', 'the impact of living YOD', 'needs of people with YOD' and 'Living well with young onset dementia'. Nine subordinate themes captured participant experiences of developing cognitive difficulties, being diagnosed with YOD, and subsequently living with the condition. Key issues emerging included: a lack of general awareness of YOD; how this can delay help seeking; commonalities in pre-diagnosis trajectories; retrospective understanding of pre-diagnosis symptom patterns; the difficulties of obtaining a firm diagnosis; the importance of face-to-face support; difficulties associated with daily living. Participants also described the emotional and psychological impact of the condition and the importance of formal and informal support networks.

### Conclusions

People who have a diagnosis of YOD regard themselves as distinct from older people with dementia. Despite similar symptoms, the context in which they experience the condition creates a range of distinct psycho-social concerns not commonly well addressed by health and social care services. As awareness of YOD continues to grow, the development (or adaptation) of services which take into account the idiosyncratic needs of people with YOD should be addressed.

### Strengths and limitations of the study

- This was an in-depth qualitative study focusing on the lived experience of people diagnosed with YOD.
- A representative sample of participants were interviewed, with variations in socio-demographic status, gender and age at diagnosis.
- The principles of interpretative phenomenological analysis were utilised to analyse the data.
- The sample was relatively small, and participants were drawn from a single region in the UK.



- Some participants were interviewed together with their carers, which could have influenced what they reported.

## Background

There are 850,000 people living with dementia in the UK (1). The condition is increasingly recognised as a serious health and social challenge because it not only affects the person with the illness, but also directly impacts on their family, their carers and their wider social circle. (2) In the UK, tackling with dementia is high on the health policy agenda, and there have been a series of initiatives since the launch of the National Dementia Strategy, (3) aimed at raising awareness of the condition and improving the care available. (4,5,6,7) Similarly, the challenges encountered by those who care for people with dementia – either on a formal or informal basis – are increasingly acknowledged. (8) There have been a number of studies, (9,10,11) and policy initiatives (12,13) focusing on this particular group.

Although dementia is often associated with ageing, it not only affects older adults. According to estimates based on expert opinion, in 2013 there were over 40,000 people in the UK living with dementia who were under 65 years of age (14). This estimate is still widely quoted, however the actual number of people who currently have YOD is unknown. Although there is now a 15 year history of studies focusing on people with young onset dementia (YOD) (15) they are still a relatively marginalised group, and largely absent from active involvement in the development of services. Cases of undiagnosed YOD are very common, with reports as high as 30-50% (16) and again, may be attributed partly to the general perception that dementia is a condition of old age (17). Younger people who develop the condition are likely to present with a wider variety of symptoms compared to those over 65 years, (18) and this too can complicate matters. Memory loss and cognitive impairments which are strongly associated with dementia may not be the main presenting problem for a younger person, and the sometimes ill-defined symptoms that characterise the initial stages of the condition are often ascribed to other conditions such as depression or stress. (19,15) People with frontotemporal dementia, for example, can initially present with personality changes as their primary symptom, and younger people may also have difficulties with visuospatial and semantic tasks. (20) Another reason why people with YOD are currently viewed as a marginalised population may relate to the psycho-social limitations that the condition can impose. (21) This often includes social isolation, (22) and fears of stigma (20). As a result of this the likelihood that a person will become engaged in public activism or campaigning is low. (23)

For people who receive a diagnosis of dementia at a relatively young age, the implications can be different from those who develop the condition in later years, beyond traditional retirement age. The implications can be particularly severe (24) with a person having YOD being more likely to still be in paid employment, and may have dependents including spouses, children and/or ageing parents to support. (15,22) Post-diagnosis, individuals can remain in relatively good physical health for many years, but the awareness of an inevitably accelerated mental deterioration, and the implications this will have, is in itself a source of great stress for both the person with the condition and those around them. (25) It can also be difficult for younger people to access appropriate community and residential services because mainstream dementia care services are aimed primarily at older adults and are often

1  
2  
3 not suitable to their requirements. (26) Furthermore, services for younger people with dementia are  
4 often overlooked in mental health strategies which tend to default to the needs of older adults and  
5 they are frequently excluded from working age mental health services, reinforcing dementia as an  
6 older person's illness. (27)  
7

8  
9 The aim of this study was to explore the experiences and needs of younger people living with  
10 dementia – to facilitate an understanding of the issues that impact on them, and to identify  
11 opportunities for the development of services that might be a better 'fit' with the unique context of  
12 their needs.  
13

## 14 15 16 **Methods**

### 17 18 19 **Sample**

20 The sample comprised 14 people with YOD aged between 57-67 years. Age at diagnosis ranged from  
21 52-64 years. All had obtained their diagnosis before the age of 65. Of these, five interviews were  
22 paired (person with dementia and their carer) but the carer voices are not reported on here. In-depth  
23 analysis of data from a sample of this size is appropriate for IPA.  
24  
25

### 26 27 **Recruitment**

28 Study participants were recruited from a number of YOD support organisations based in the North of  
29 England between February 2016 and April 2017. These were third sector organisations including a  
30 local group affiliated to Age UK, which supported around 50 people with YOD, and a not for profit  
31 community interest company providing person centred support to people living with dementia which  
32 currently dealt with over 200 referrals a year. Participants were also recruited from an NHS  
33 neurological unit which processed the majority of regional referrals for dementia assessment. All  
34 participants were given the opportunity to receive ongoing updates from the study, as well as any  
35 published outputs.  
36  
37

### 38 39 **Interviews**

40 Interviews took place at a time and place convenient to participants, usually their home or community  
41 support group premises. Written informed consent to audiotape interviews was obtained. Interviews  
42 were semi-structured, narrative driven and explored issues including: participants' experiences of  
43 diagnosis; their trajectory of knowledge about the condition; use and experiences of statutory and  
44 non-statutory health and social care services; engagement with information resources and support  
45 organisations; and the impact of dementia on their daily lives.  
46  
47

48 Interviews were conducted by LR and MO, elicited between 30 and 120 minutes of audio-recording  
49 each and were fully transcribed by an external transcription company. To ensure that the PWD had the  
50 dominant voice during interviews that were conducted with carers present, questions were directed  
51 primarily at the PWD; the carer would interject if they felt they had extra information to support what  
52 the PWD was saying.  
53  
54

### 55 56 **Patient and public involvement**

57  
58  
59  
60

1  
2  
3 The research team developed an interview topic guide in partnership with members of a dedicated  
4 study advisory group which comprised twelve people who were either living with YOD (seven) or were  
5 the carers of people living with YOD (five). The study's steering group, which included representatives  
6 from service providing agencies, health practitioners specialising in dementia care and members of the  
7 research team, also contributed to the development of the initial interview guide. Both groups  
8 commented on subsequent revisions of the guide as the project developed.  
9

## 10 11 12 **Analysis**

13 In line with a growing number of other studies on the lived experience of dementia, interpretative  
14 phenomenological analysis (IPA) was applied. (28). IPA is an established method for researchers to  
15 explore the experience of individuals going through illness and the meanings people attach to those  
16 experiences. (29) IPA fosters the incorporation of individual perspectives, and the idiosyncratic  
17 meanings that participants attached to elements of their experience, which is particularly important  
18 given our limited knowledge of the experience of living with YOD. The relevance for using IPA with  
19 people with chronic illness has also been highlighted, as the approach accepts that participants are  
20 their own experts. (30) Analysis was undertaken by LR with independent verification of emergent  
21 themes with TW using a small subset of five transcripts.  
22  
23  
24  
25

26 At a practical level, transcripts were first analysed individually and read several times while  
27 simultaneously listening to the audio-recording. The written content was formatted into a table to  
28 facilitate the annotation process. First, simple, descriptive comments were made while reading and  
29 listening to the transcript in order to reveal the content. The process was repeated a second and third  
30 time to note linguistic (use of language, laughter and voice tone) and conceptual (questions and  
31 interpretations of the text) comments respectively. The conceptual level of annotation is particularly  
32 important because it adds depth to the analysis. Various techniques were employed to search for  
33 connections across themes, on a case by case basis. These included abstraction (grouping similar  
34 themes), polarisation (focusing on differences between themes) and numeration (looking at  
35 frequencies of themes). The result was a list of superordinate themes and their respective subordinate  
36 themes for each participant.  
37  
38  
39  
40  
41

## 42 **Results**

43 The analysis revealed four superordinate themes that represent prominent features of participants'  
44 stories collectively. The superordinate themes each comprise three subordinate themes (see Table 1)  
45 which vary in terms of their contribution from individual participants. In line with IPA philosophy,  
46 unique and common elements from the perspectives of participants are therefore represented. The  
47 superordinate themes were: *the process of diagnosis; the impact of living with YOD; the needs of*  
48 *people with YOD; living well with YOD.*  
49  
50  
51  
52

### 53 **Insert Table 1 about here**

54  
55  
56 Superordinate Theme 1: *The process of diagnosis*  
57  
58  
59  
60

1  
2  
3  
4 Participants talked extensively about how they received their diagnosis and the impact that this had on  
5 them, their families, and their wider social circle. The experience was characterised by a distinction  
6 between pre and post diagnostic phases. The pre-diagnosis phase was the period when the first subtle  
7 signs and changes in behaviour started to occur. It could be a particularly difficult and uncertain time  
8 for people who were still likely to be active, working and looking after dependents. It was usual for  
9 people who began to experience problems in carrying out their usual routines to battle to maintain  
10 control until a point of crisis forced them to seek help. The pre-diagnosis period was only really  
11 revealed and assimilated in hindsight, once a person could make retrospective connections between  
12 their gradually emerging symptoms – such as confusion and increasing memory problems – and their  
13 condition.  
14  
15

16  
17 A lack of awareness relating to YOD was reported by participants in the pre-diagnosis phase. In some  
18 cases, this had delayed the point at which they sought help. The interviewees gave a number of  
19 examples of signs and symptoms that were experienced during the early stages of their condition, but  
20 as these could occur in isolation, and were not always to do with memory issues, they were not  
21 immediately seen as indicators of a single underlying condition.  
22  
23

24 I found that my concentration wasn't the same. I could be stood cooking something and I'd  
25 go away and then I'd forget, until the smoke alarm was going off. . . I was decorating the  
26 bathroom at the time, I'd got the first piece of paper up then I couldn't fathom out how to  
27 match and I thought oh this isn't right . . . I could plug in the vacuum cleaner but I didn't  
28 know how to turn it on. (Participant 3)  
29  
30

31 I didn't think of it as an illness, I just thought I was having . . . but you know you just think  
32 the job is very stressful and you always have a, 'oh well, we were busy last night.'  
33 (Participant 4)  
34  
35

36 Even after people decided to seek help, it could be difficult to get a firm diagnosis, and there was often  
37 a reported struggle to be heard by health professionals:  
38  
39

40 The doctors and consultants were saying, 'no, you're too young to have dementia'. At this  
41 time I was about 49. So their thinking was it could be depression or stress because I was still  
42 working at this point. (Participant 1)  
43  
44

45 [Speaking about her GP] She put me on some tablet anyway, she said it was depression. . . I  
46 said to her, look it's getting that bad I'm looking after children, I can't do it. (Participant 3)  
47  
48

49 Participants had mixed views on the actual process of receiving a diagnosis. As with the process of  
50 being told about any life changing illness, interpersonal issues relating to the communication  
51 awareness and empathy of health care practitioners was important on an individual level. However,  
52 regardless of how the news was delivered, and the psychosocial support that may have been available,  
53 there was unanimity over the shock of actually receiving a diagnosis:  
54  
55

1  
2  
3 . . . and then they proceeded to tell me that I had Alzheimer's. At which point I just froze  
4 completely. (Participant 1)  
5

6 [They said] it's early onset Alzheimer's disease, just out of the blue like that. Well I was  
7 numb. (Participant 3)  
8  
9

10 . . . it was awful. I felt like I was hit by a sledgehammer. . . I felt as though somebody had  
11 pulled the plug out of everything. (Participant 5)  
12

13  
14 At a practical level, a recurring issue was the amount of supporting documentation and information  
15 that participants were given at the point of diagnosis, and how this could be overwhelming.  
16

17 . . . and you're bombarded with, take this, take that, take this, take that. All these leaflets  
18 and basically all you want to do is sit down and think it through yourselves. (Participant 9)  
19

20  
21 I was given a pile of documents and I went home and put them in a cupboard. I have spoken  
22 to a number of people and it is a shared experience. It's all just too much to take on board  
23 and really, just a page would have done to point out the services. (Participant 10)  
24

25  
26 The predominance of leaflets as opposed to face-to-face support was also highlighted:  
27

28 When I got home I was so angry, all the leaflets went straight in the bin. That was my way of  
29 thinking, I don't need the bloody leaflets, they don't mean anything to me. . . so yeah,  
30 leaflets weren't I mean for me. The thing that would have helped me most would've been for  
31 someone to be around outside my consultation room and approach me. Not approach my  
32 husband, but approach me maybe. I don't know, maybe offered me somewhere on my own  
33 rather than me going out in a big black cloud into nothingness. (Participant 1)  
34  
35

36  
37 Some participants felt that post-diagnosis support was lacking. One acknowledged that she was coping  
38 with the help of her husband, but would have appreciated an occasional offer of support:  
39

40 . . . maybe every six to twelve months to say, 'we're here!' Particularly some emotional  
41 support. So I'd like somebody, not to take it out on, you know, somebody to talk to.  
42 (Participant 9)  
43  
44

45 A similar lack of agency was acknowledged by another participant:  
46

47 Nobody says, you know, 'how does that make you feel?' In my view there still isn't any  
48 opportunity, three years down the line and I still haven't been able to voice how it made me  
49 feel then, how I felt coping with it for the last couple of years and how my feelings are  
50 towards the future. (Participant 1)  
51  
52  
53

54 Superordinate Theme 2: *The impact of living with YOD*  
55  
56  
57  
58  
59  
60

1  
2  
3 The impact that dementia had on participants are grouped here into two main areas: *changes in*  
4 *function and daily living*, and *emotional and psychological impact*.  
5

#### 6 *Changes in function and daily living*

7 The impacts on function were wide-ranging. Again, this was not always the direct result of memory  
8 loss per se. For example, participants described problems with everyday activities such as dealing  
9 with money:  
10

11  
12 I can't count money; I haven't yet worked that one out. (Participant 2)  
13

14  
15 Sometimes I don't carry money anymore because I could fumble with it. When I used to go  
16 and pay, I couldn't count the change out. (Participant 3)  
17

18  
19 I was going to the bank, put my card in to get some money out, and I took the card out and  
20 left the money. (Participant 7)  
21

22  
23 I would, for example, go for my lunch or go into a shop and if they said that something was  
24 35 pence and I took the change out of my pocket, I couldn't count it. (Participant 10)  
25

26 Communication issues, including the inability to maintain concentration during conversations and  
27 losing the thread during interaction were highlighted. Frequently reported was an increasing difficulty  
28 in 'finding the right word', and other more individualistic effects such as difficulty in recognising faces,  
29 pronunciation and speech production. There were less obvious problems too, such as only being able  
30 to concentrate on thinking about one thing at a time, which could have a broad impact on many  
31 aspects of daily life. Participants 4, 12 and 13, described noticing themselves becoming  
32 uncharacteristically confused and forgetful at work:  
33

34  
35 Well in my job [nursing] I was forgetting a lot of things, which I hadn't done before. I was a  
36 perfectionist in my job and I was then forgetting, not forgetting how to do things but – yes, I  
37 suppose, in a way. What was happening was I was forgetting parts of what I was doing. . .  
38 One night I came back and they said, 'oh, how was such and such a body?' And I went, 'oh, I  
39 can't remember what I gave him.' So they were all going round and asking was it this? Was it  
40 that? And we have got like 12 of us in the office and they are all shouting out 'oh, is it this or  
41 is it that?' And then all of a sudden somebody said the word and I went 'Yes! That's what I've  
42 done, that's it' And I got a round of applause. . . (Participant 4)  
43  
44  
45

46 And actually, I think that was the time when I really thought, maybe I have got something.  
47 But I wrote the bloody thing and I couldn't remember it. (Participant 12)  
48

49  
50 I absolutely loved my job and then it just, I started, I realised that it was, I would come in the  
51 following day and couldn't remember what I'd worked on the night before. (Participant 13)  
52

#### 53 *Emotional and psychological impact*

54 Participants described their struggles and fears around living with dementia. These included  
55 uncertainty for the future and concerns about putting themselves at risk while struggling to maintain  
56  
57

1  
2  
3 an image of themselves as 'normal' members of the community. A sense of trying to cover things up,  
4 and keep the realities of the condition hidden was evident:  
5

6 I cover up a lot. . . If I'm in a doctor's surgery I will get a magazine and flip through it. I can  
7 read the words but it doesn't make sense what's there. I don't understand what I'm reading  
8 but I wouldn't give people the satisfaction of thinking. . . To them they probably just think I'm  
9 reading. So really you mask a lot of things just to try and still fit in with society so you're not,  
10 like, different. (Participant 3)  
11  
12

13 You know you sort of live a double life almost. You know, you're sort of, 'yeah I'm fine, I'm  
14 fine.' But underneath you're thinking well am I going to see my grandkids grow up?  
15 (Participant 1)  
16

17 The importance of work, not only as a source of income but also of identity, was highlighted by  
18 participants. Also what was striking was the deep sense of loss that could occur when people  
19 were forced to stop working because of their cognitive difficulties – even if YOD had not yet been  
20 formally diagnosed. Eight of the interviewees with YOD were in paid employment at the time of  
21 their diagnosis.  
22  
23

24 I had to give up work and that was devastating, being a carer. When I realised that my clients  
25 were in danger, I thought I can't carry on with my job. (Participant 1)  
26  
27  
28  
29

30 [In a hospital] you see, if you are making a mistake, somebody is going to get hurt. That was  
31 the problem. That's why, when I went to see them, they told me I couldn't work anymore.  
32 (Participant 4)  
33  
34

### 35 Superordinate Theme 3: *The needs of people with YOD* 36

37 The majority of participants felt that the support of their family, friends and other people living with  
38 dementia was crucial. Those who did not have spouses often had a key person, possibly a close friend  
39 or child, who provided emotional and practical support:  
40  
41

42 [Talking about her daughter] She has gone through a lot with me in the last 12 months. . .  
43 and we have good communication, she can read me, she knows when I walk through that  
44 door in the morning, she knows if it's a good or bad day. (Participant 6)  
45  
46

47 Dementia-specific community groups were also seen as a significant source of support, and the  
48 importance of being able to relate to other people who had been, or were currently going through, a  
49 similar experience was highlighted:  
50  
51

52 . . . because there is nothing like having somebody who has got the same problem telling  
53 you how to cope with it, you know. Because you have been there, you have done it and you  
54 have got the t-shirt. I found [name of a high-profile UK dementia activist] was the best  
55  
56  
57  
58  
59  
60

1  
2  
3 ambassador for it, because I looked at him and I thought, that's how I want to be in seven  
4 or eight years. (Participant 4)  
5

6 I find that I am getting more support through people from the groups. (Participant 8)  
7

8  
9 However, participants reported that it was important for the support they were offered to take into  
10 account that they may have different needs and interests to older people with dementia. Support  
11 groups that were specifically organised for people with YOD, rather than dementia in general were  
12 praised because they offered age-appropriate activities and – at their best – helped to develop a sense  
13 of independence and empowerment.  
14

15  
16 I think people of my own age, if they set up a group for them. Because we are probably a bit  
17 more able minded to do things, our faculties are probably a little bit better than maybe the  
18 older ones are. . . because everything at the moment is based on older people. . .it's like  
19 being in school and it's all old war songs. Well I wasn't even born in the war. (Participant 3)  
20  
21

22 There was also a strong sense that any new initiatives need to acknowledge that not everybody will  
23 wish to engage with 'traditional' dementia support group formats – singing groups, reminiscence  
24 groups and so on. Again, this was largely because of the perception that these groups catered mainly  
25 for older people. Participants, who were still living independently, expressed a need for a less formal  
26 approach in how dementia group sessions were booked and arranged:  
27

28  
29 [If] you have a singing group for dementia, why do I have to make an appointment? Surely I  
30 should be able to just walk through the door and go 'hello, I am such a body, I've got young  
31 onset dementia, can I see what you're about please?' I shouldn't have to phone up and  
32 have to book in. . . It's the way they run their groups, this phone up and book in. Sorry, but  
33 how can anyone with dementia, unless they've got a carer, remember to phone up and  
34 book a spot? (Participant 6)  
35  
36  
37  
38

#### 39 Superordinate Theme 4: *Living well with young onset dementia* 40

41 A powerful theme from the interviews was people's descriptions of how they were coping and getting  
42 on with their lives and the many inspirational stories and examples that they gave. The need to  
43 engage in meaningful activity in order to maintain their wellbeing was very strong. Participants  
44 showed a remarkable ability to remain positive throughout their illness and for some this was viewed  
45 as a coping strategy, actively seeking to protect this optimism:  
46

47 My doctor put it right the other week, when she said if she didn't have all my test  
48 results in front of her, she wouldn't believe I had dementia. I think if I carry on doing  
49 different things and if I keep moving the dementia can't catch me. (Participant 15)  
50 I came to the conclusion that reading things like that are not going to do me any good.  
51 They are just going to send me into a pit of despair which is something I wasn't going  
52 to do...(later)...I don't think about the future. I have the thing that yesterday is history,  
53 tomorrow's a mystery and today is the present and that's why they call it a gift.  
54 (Participant 20)  
55  
56  
57  
58  
59  
60



1  
2  
3 Not everybody, however, has the ability to confront their illness with a positive attitude. It is  
4 therefore important to consider other strategies that people can draw on to help themselves  
5 to live well. Strategies that might be more inclusive and open to the wider population of  
6 people living with dementia. Individuals are hugely resourceful and have impressive  
7 management strategies that should be documented and these are quite often very simple  
8 things:  
9

10  
11  
12  
13  
14 Speak slowly, speak calmly, speak in words I can understand, that's the main  
15 important thing. I may not remember what you've just told me so please can you  
16 write it down for me, or I can write it down so that when I go away from here I know  
17 what you've told me. (Participant 2)  
18

19  
20 Simply keeping things routine and familiar could also be a very effective coping strategy.  
21 Participant 4 for example, acknowledged that she struggled more when out of a routine and  
22 the familiarity of her house helped because she knew where everything was and how to get to  
23 it. Participant 20 said that he now struggled to watch television, but he refused to give up and  
24 adapted this activity with the following example:  
25

26 I can't remember the last time I watched a film because ten minutes in and I have  
27 forgotten exactly what is happening. So I rarely watch television, but if I do, I watch  
28 something where there is no plot to follow, so I will watch things like Animal Planet  
29 because you are just looking at animals then, there is no plot actually to it. (Participant  
30 20)  
31

32 The need to keep active and the therapeutic benefits of activity were themes common to all  
33 participants. Examples included learning to swim, taking up gardening, raising and forming  
34 companionship with a dog, giving talks nationwide on the experience of living with dementia,  
35 raising awareness, becoming involved in research, campaigning and gaining employment in a  
36 caring capacity to support others to live well with dementia. Participants made the important  
37 link between activity and wellbeing:  
38

39  
40 So they are the first things that helped me to live well. And then I think, also, was the  
41 swimming was the main one for me. More so probably than the young onset group.  
42 (Participant 4)  
43

44 If you sit at home and vegetate, you're dead. Because the longer you do it, the worse  
45 it gets. So you need to get yourself out doing something, anything, regardless. Clean  
46 the house or something like this. Do something. I was lucky because we knew we were  
47 going to get a dog and we've got the dog and everybody loves him (Participant 7)  
48

49 That's why I have my crosswords in the morning paper. I was told to keep the brain  
50 ticking over and active. And now, believe it or not, it's only today – a Tuesday – that I  
51 don't have anything to do. (Participant 12)  
52

53 The positive for us is that as I say we travel, we go and do different things...we're just  
54 trying to keep occupied. (Participant 15)  
55  
56  
57  
58  
59  
60

## Discussion

Participants described in detail their particular experiences of receiving a diagnosis of dementia at a relatively young age, and coming to terms with the situation they found themselves in. The principle findings of the study included: a lack of general awareness of YOD; how this can delay help seeking; commonalities in pre-diagnosis trajectories; retrospective understanding of pre-diagnosis symptom patterns; the difficulties of obtaining a firm diagnosis; the importance of face-to-face support; difficulties associated with daily living. Participants also described the emotional and psychological impact of the condition and the importance of formal and informal support networks.

Currently, although medical and lay awareness about dementia issues in general is on the ascendant, (31) and the idiosyncratic collection of psycho-social issues that it engenders, remain at the margins of public awareness. (32) People who are formally diagnosed can find themselves in a position where, for the purposes of many health and social support interventions, their needs are aggregated with those of people who develop dementia much later in life. On one level this may not appear to be a significant issue; functionally, the symptoms exhibited by both cohorts will be similar, and so too will be the choice of treatments and therapies available. (33) For many people with YOD, however, there are likely to be a whole raft of tangential - often age related - psycho-social issues, such as still being in employment or in a spousal relationship, that have a profound impact on the way in which they come to terms with their condition and whether or not they develop effective ways of living with it.

The findings from this study concur with other work which has highlighted that people with YOD face a range of specific difficulties that do not necessarily impact on older people to the same degree. (34,35) The often-lengthy period leading up to the point at which a person recognises that they need to seek help is the first of these. In line with other studies, (36,37) for a number of our participants, the initial signs that something was wrong were not directly related to memory problems, but to wider and more general cognitive anomalies or behavioural changes, with eight participants first noticing problems whilst at work. Basic memory issues such as increasing forgetfulness could be a significant element, but might well only have been one of a variety of sporadic perturbations in spatial awareness or episodes of general confusion. Again, with an older person, the onset of such symptoms might readily indicate the onset of dementia. But with younger people, connections are often not made until much further on in the disease process. (38) In line with studies on self-identity and illness, (39,40) people may attribute these kinds of symptomatic patterns to work stress or other causes such as depression. (41)

It was evident that the process of receiving and accepting a diagnosis of YOD was extremely difficult for most people. At an interactional level there have been few recommendations relating to how health professionals might better adapt their approach to delivering a diagnosis – one that might, for example, more readily take into account the perspective of the younger person. Furthermore, although there have been significant improvements in the provision of relevant health and support information in recent years, (24) this in itself appears to be causing some problems, not least that the major part of it is still skewed towards older patients and their carers. As has been suggested in studies on information provision for other serious conditions (42,43) people in this study reported feeling overwhelmed at the point of diagnosis by the sheer amount of material they were given, to the point

1  
2  
3 where they simply disengaged with it. For a condition that can place such restrictions on cognitive  
4 processes, more effective and streamlined ways of delivering information tailored specifically for those  
5 with YOD need to be devised.  
6

7  
8 Unlike those who develop dementia after they reach traditional retirement age, people with YOD will  
9 commonly be in employment or eligible for employment at diagnosis. Having to give up work or the  
10 prospect of preferred work, and the severe implications this has on many levels, was a recurring  
11 theme. Ironically, still being engaged in a work environment and being in a position where subtle  
12 changes in behaviour and cognitive ability might be more readily noticed – both by the person  
13 themselves and also by their co-workers – could be a significant trigger in prompting people to seek  
14 help. Occasionally this decision may be forced upon them, particularly if they work in a field where  
15 their ability and actions could be a danger to others, such as healthcare, making the experience  
16 particularly difficult.  
17  
18

19  
20 Study participants were clear about the importance they placed on family, friends and peers (other  
21 people living with dementia) as a source of support, at both a psychological and practical level. The  
22 study suggests, however, that as with information provision and care pathway engagement, attitudes  
23 towards formal and informal support groups can be ambiguous. While efforts to provide such support  
24 were universally appreciated, there was a definite sense that the traditional forms of dementia  
25 focused support group do not always follow formats or offer activities that younger people wish to  
26 engage with. More passive reminiscence-based activities, for example, that are very common in care  
27 homes and other environments that support older people with dementia, are often focused on  
28 periods before some people with YOD were born and may not resonate well with them.  
29  
30

31  
32 When talking about living well with dementia, the intention is not to make light of the experience of  
33 dementia, it's more about challenging the stereotype. Previous research on the experience of living  
34 with dementia often serves to fuel this negative image of what it might be like to live with the  
35 condition. What we need to start to focus on are ways of understanding the positive experiences,  
36 strengths and capabilities that people draw on to improve their own wellbeing.  
37  
38

### 39 Strengths and weaknesses of the study

40 This was an in-depth qualitative study focusing on the lived experience of people diagnosed with YOD.  
41 Although our sample was relatively small, for an in-depth qualitative study of this nature, utilising an  
42 interpretive phenomenological approach, it was entirely adequate. We were able to interview a  
43 representative cross-section of participants in terms of socio-demographic status, age and gender. A  
44 potential weakness of the study could be that as some participants were interviewed together with  
45 their carer, this might have influenced what they said. Where it was not possible to interview  
46 participants alone, we tried to ensure that the 'voice' of the person with YOD was not overshadowed.  
47 The regional nature of the study might also have influenced reports on issues such as engaging with  
48 services. However, this may have been offset by the socio-demographic spread of participants, which  
49 covered a range of high and low socio-economic status individuals and included people who had  
50 engaged with both NHS and private services.  
51  
52  
53

54  
55 In terms of unanswered questions for future research, and the implications for policy makers and  
56 clinicians that these might have, the study has particularly highlighted the need for more detailed work  
57  
58

1  
2  
3 on the way in which information is tailored to the needs of younger people at point of diagnosis. In  
4 particular, how to more clearly differentiate what is available for this group from the material offered  
5 to older patients. In one sense, the success of current awareness raising initiatives for dementia in  
6 general may have worked against those who are diagnosed when younger. While they are clearly now  
7 becoming more visible, they are still not sufficiently defined as a group to attract a coherent cross-  
8 service collection of material that would be less alienating to them.  
9

## 10 11 12 13 14 15 **Conclusions**

16  
17 This study used innovative participatory methods and built on existing work in this area by examining  
18 post-diagnostic support in a region with relevant service provision for YOD. Participants gave detailed  
19 accounts of their needs and experiences relating to living with YOD and described a wide range of  
20 issues that affected them. Our findings are largely in line with other studies that have begun to focus  
21 on this group, (15) and confirms that those who have a diagnosis of YOD see themselves as distinct  
22 from older people with the condition – even if they experience similar symptoms. We show that peer  
23 support is crucial for people living with YOD, as is the need for them to engage in YOD-specific groups  
24 with age-appropriate activities.  
25  
26

27  
28 There have been significant positive developments at both a national and local level in the re-  
29 positioning of care pathways and social support for people with dementia (5,6). In parallel with these  
30 there have also been a number of high profile dementia focused initiatives that set out to actively  
31 address the needs of people with YOD as well as older people. Two prime examples are *Dementia*  
32 *Friendly Communities* run by the Alzheimer’s Society, (44) and the *Dementia Engagement and*  
33 *Empowerment Project (DEEP)*, (45) which aims to bring together groups of people with dementia from  
34 across the UK and support attempts to improve services. As awareness of YOD continues to grow, the  
35 development (or adaptation) of support services such as these which take into account the particular  
36 requirements of this younger group need to be maintained. Although the number of people with YOD  
37 is admittedly extremely small when compared with the number of older people with dementia, there  
38 is potential for incremental (and inexpensive) adjustments to existing health and social care  
39 interventions which could make a significant difference to their ability to live independently, with good  
40 quality of life, for as long as possible.  
41  
42  
43  
44  
45  
46  
47

### 48 **Funding.**

49 This work was supported by a project grant from The Booth Charities, Salford, UK. The full title of the  
50 study was: *‘Living well with young onset dementia - Humphrey Booth Resource Centre as a hub of*  
51 *excellence in a system of support.’*  
52  
53

### 54 **Competing interests.**

55 None  
56  
57  
58  
59  
60

**Ethical review.**

Approval for the study was obtained from the Health Research Authority – Preston Research Ethics Committee. (REC Reference Number: 15/NW/0921.)

**Author contributions:**

JC led on the writing and participated in the analysis. LR gathered the data, led the analysis and participated in the writing. TW conceived the research idea and study design, and participated in the analysis and writing. MO undertook some interviews and analysis, and writing. AW contributed to writing. All authors commented on and approved the final version of the manuscript.

**Acknowledgements:**

We would like to thank all of the participants in the study for sharing their experiences and all members of the study advisory and steering groups.

**Data Sharing:**

No additional data are available.

**References**

- 1 Alzheimer's Research. Alzheimer's Society 2017. London.
- 2 De Waal H, Lyketsos C, Ames D, O'Brien J. Designing and Delivering Dementia Services. Cambridge. Wiley Blackwell. 2013.
- 3 Department of Health. The National Dementia Strategy London. Crown Copyright. (2009)
- 4 Public Health England. Dementia: Applying all our Health. London. Crown Copyright. (2017)
- 5 Department of Health. Making a Difference in Dementia: Nursing Vision and Strategy. London. Crown Copyright. (2016)
- 6 Department of Health. Living well with Dementia: a national Dementia Strategy. London. Crown Copyright. (2011)
- 7 Department of Health. Prime Minister's Challenge on Dementia: Delivering Major Improvements in Dementia Care by 2015. London. Crown Copyright (2012)
- 8 National Institute for Health and Clinical Excellence and the Social Care Institute for Excellence. Dementia: The NICE-SCIE Guideline on Supporting People with Dementia and their Carers in Health and Social Care – Amended to Include Guideline 421. London. Crown Copyright. (2011)
- 9 Donnellan W J, Bennett K M, Soulsby L K. Family close but friends closer: exploring social support and resilience in older spousal dementia carers. *Aging & Mental Health* 2017;21.11:1222-1228.
- 10 O'Dwyer S T, Moyle W, Zimmer-Gembeck M, De Leo D. Suicidal ideation in family carers of people with dementia. *Aging & Mental Health*. 2016;20.2:222-230.
- 11 Peel E, Harding R. 'It's a huge maze, the system, it's a terrible maze': Dementia carers' constructions of navigating health and social care services. *Dementia*. 2014;13.5:642-661.

- 1  
2  
3 12 Public Health England. Dementia and housing: an assessment tool for local commissioning.  
4 London. Crown Copyright. (2016)  
5  
6 13 Department of Health. Post-legislative assessment of the Health and Social Care Act 2008  
7 Memorandum to the House of Commons Health Select Committee. London. Crown Copyright. (2013).  
8  
9 14 Alzheimer's Research. Alzheimer's Society 2017. London.  
10  
11 15 Mayrhofer A, Mathie E, McKeown J, Bunn F, Goodman C. Age-appropriate services for people  
12 diagnosed with young onset dementia (YOD): a systematic review. *Aging & Mental Health*. 2017 Jun  
13 1:1-9.  
14  
15 16 Bentham P, La Fontaine J. Services for younger people with dementia. *Psychiatry*. 2008;7.2:84-87  
16  
17 17 Werner P, Stein-Shvachman I, Korczyn A D. Early onset dementia: *clinical and social aspects*.  
18 *International Psychogeriatrics*. 2009;21.4:631-636.  
19  
20 18 Pipon-Young F E, Lee K M, Jones F, Guss R. I'm not all gone, I can still speak: The experiences of  
21 younger people with dementia. An action research study. *Dementia*. 2012;11.5:596-616.  
22  
23 19 Harris P B, Keady J. Selfhood in younger onset dementia: transitions and testimonies. *Aging and*  
24 *Mental Health*. 2009;13.3:437-444.  
25  
26 20 Roach P, Keady J, Bee P, Hope P. Subjective experiences of younger people with dementia and  
27 their families: implications for UK research, policy and practice. *Reviews in Clinical Gerontology*.  
28 2008;18.2:165-174  
29  
30 21 Luscombe G, Brodaty H, Freeth S. Younger people with dementia: diagnostic issues, effects on  
31 carers and use of services. *International Journal of Geriatric Psychiatry*. 1998;13.5:323-330.  
32  
33 22 Beattie A, Daker-White G, Gilliard J, Means R. 'How can they tell?' A qualitative study of the views  
34 of younger people about their dementia and dementia care services. *Health & Social Care in the*  
35 *Community*. 2014;12.4:359-368.  
36  
37 23 Harris P B, Keady J. Selfhood in younger onset dementia: transitions and testimonies. *Aging and*  
38 *Mental Health*. 2009;13.3:437-444.  
39  
40 24 Rayment D, Kuruvilla T. Service Provision for Young-Onset Dementia in the UK. *Progress in*  
41 *Neurology and Psychiatry*. 2015:28-30  
42  
43 25 Kaiser S, Panegyres P K. The psychosocial impact of young onset dementia on spouses. *American*  
44 *Journal of Alzheimer's Disease & Other Dementias*. 2007;21.6:398-402.  
45  
46 26 Withall A. The Challenges of Service Provision in Younger-Onset Dementia. *Journal of the American*  
47 *Medical Directors Association*. 2013:230-232.  
48  
49 27 Connolly P, Perea N. *Developing an Ideal Old Age Service*. Royal College of Psychiatrists 2013.  
50 London.  
51  
52 28 Clemerson G, Walsh S, Issac C. Towards living well with young onset dementia: an exploration of  
53 coping from the perspective of those diagnosed. *Dementia*. 2013;13.4:451-466  
54  
55 29 Smith J A, Flowers P, Larkin M. *Interpretative Phenomenological Analysis*. London. Sage  
56 Publications Ltd. 2009  
57  
58  
59  
60

1  
2  
3 30 Cronin-Davis J, Butler A, Mayers C A. Occupational therapy and interpretative phenomenological  
4 analysis: comparable research companions? *British Journal of Occupational Therapy*. 2009;72.8:332 –  
5 338.

6  
7 31 Ahmad S, Orrell M, Iliffe S, Gracie A. GPs' attitudes, awareness, and practice regarding early  
8 diagnosis of dementia. *Br J Gen Pract*. 2010; 60.578: 360-e365.

9  
10 32 Page S, Keady, J. Sharing stories: a meta-ethnographic analysis of 12 autobiographies written by  
11 people with dementia between 1989 and 2007. *Ageing & Society*. 2010;30.3:511-526.

12  
13 33 McMurtray A, Clark D G, Christine D, Mendez M F. Early-onset dementia: frequency and causes  
14 compared to late-onset dementia. *Dementia and Geriatric Cognitive Disorders*. 2006;21.2:59-64.

15  
16 34 Baptista M A T, Santos R L, Kimura N, Lacerda I B, Johannessen A, Barca M L, Engedal K, Dourado  
17 M C N. Quality of life in young onset dementia: an updated systematic review. *Trends in Psychiatry and  
18 Psychotherapy*. 2016; 38.1:6-13.

19  
20 35 Svanberg E, Spector A, Stott, J. The impact of young onset dementia on the family: a literature  
21 review. *International Psychogeriatrics*. 2011;23.3:356-371.

22  
23 36 Van Vliet D, Persoon A, Bakker C, Koopmans R T, de Vugt M E, Bielderma A, Gerritsen D L. Feeling  
24 useful and engaged in daily life: exploring the experiences of people with young-onset dementia.  
25 *International Psychogeriatrics*. 2017:1-10.

26  
27 37 Draper B, Cations M, White F, Trollor J, Loy C, Brodaty H, Sachdev P, Gonski P, Demirkol A,  
28 Cumming R G, Withall A. Time to diagnosis in young-onset dementia and its determinants: the  
29 INSPIRED study. *International journal of geriatric psychiatry*. 2016;31.11:1217-1224.

30  
31 38 Van Vliet D, de Vugt M E, Bakker C, Pijnenburg Y A L, Vernooij-Dassen M J F J, Koopmans R T C M,  
32 Verhey F R J. Time to diagnosis in young-onset dementia as compared with late-onset dementia.  
33 *Psychological Medicine*. 2013;43.2:423-432.

34  
35 39 Thoits P A. Self, identity, stress, and mental health. In *Handbook of the sociology of mental health*.  
36 Netherlands. Springer. 2013: 357-377

37  
38 40 Caddell L S, Clare L. The impact of dementia on self and identity: A systematic review. *Clinical  
39 Psychology Review*. 2010; 30.1:113-126.

40  
41 41 Mendez M F. The accurate diagnosis of early-onset dementia. *The International Journal of  
42 Psychiatry in Medicine*. 2006;36.4:401-412.

43  
44 42 Harding R, Selman L, Beynon T, Hodson F, Coady E, Read C, Walton M, Gibbs L, Higginson I J.  
45 Meeting the communication and information needs of chronic heart failure patients. *Journal of Pain  
46 and Symptom Management*. 2008;36.2:149-156.

47  
48 43 Cox A, Jenkins V, Catt S, Langridge C, Fallowfield L. Information needs and experiences: an audit of  
49 UK cancer patients. *European Journal of Oncology Nursing*. 2006;10.4:263-272.

50  
51 44 [https://www.alzheimers.org.uk/info/20079/dementia\\_friendly\\_communities](https://www.alzheimers.org.uk/info/20079/dementia_friendly_communities)

52  
53 45 <http://dementivoices.org.uk>

**Superordinate theme****Subordinate theme****Key words and issues**

| <b>Superordinate theme</b>                           | <b>Subordinate theme</b>                 | <b>Key words and issues</b>                                                                        |
|------------------------------------------------------|------------------------------------------|----------------------------------------------------------------------------------------------------|
| <b>1. Process of diagnosis</b>                       | <i>Pre-diagnosis</i>                     | Warning signs, alarm bells, too young                                                              |
|                                                      | <i>'Hit by a sledge hammer'</i>          | Sledgehammer, shock, lack of support, information overload                                         |
|                                                      | <i>Post-diagnosis</i>                    | Benefits, no follow up, looking for answers                                                        |
| <b>2. Impact of living with young onset dementia</b> | <i>Impact on behavior &amp; function</i> | Activities of daily living, money, cooking, communication, uncharacteristic behavior, loss of self |
|                                                      | <i>Psychological impact</i>              | Fear of the future, covering up, living a double life                                              |
|                                                      | <i>Impact on work</i>                    | Devastation, loss, forgetting things                                                               |



1  
2  
3 **3. Needs of people with young**  
4 **onset dementia**

*'They are my rock'*

Support, friends and family, spouse

*What helps?*

Peer support, post-diagnostic support groups.

*What could be improved?*

Raising dementia awareness, it's more than just memory, dementia groups

13 **4. Living well with young**  
14 **onset dementia**

15 \* not reported on here

*Psychological coping strategies*

Positivity, optimism

*Practical coping strategies*

Simple things, routine, familiarity

*'Trying to keep occupied'*

Therapeutic benefits of activity

25 *Table 1: Superordinate and subordinate themes from IPA analysis of all participants living*  
26 *with young onset dementia*

# Standards for Reporting Qualitative Research (SRQR)\*

<http://www.equator-network.org/reporting-guidelines/srqr/>

Page/line no(s).

## Title and abstract

|                                                                                                                                                                                                                                                              |        |
|--------------------------------------------------------------------------------------------------------------------------------------------------------------------------------------------------------------------------------------------------------------|--------|
| <p><b>Title</b> - Concise description of the nature and topic of the study Identifying the study as qualitative or indicating the approach (e.g., ethnography, grounded theory) or data collection methods (e.g., interview, focus group) is recommended</p> | Page 1 |
| <p><b>Abstract</b> - Summary of key elements of the study using the abstract format of the intended publication; typically includes background, purpose, methods, results, and conclusions</p>                                                               | Page 2 |

## Introduction

|                                                                                                                                                                     |                                                                    |
|---------------------------------------------------------------------------------------------------------------------------------------------------------------------|--------------------------------------------------------------------|
| <p><b>Problem formulation</b> - Description and significance of the problem/phenomenon studied; review of relevant theory and empirical work; problem statement</p> | Page 3 (last para) page 4 (1 <sup>st</sup> / 2 <sup>nd</sup> para) |
| <p><b>Purpose or research question</b> - Purpose of the study and specific objectives or questions</p>                                                              |                                                                    |

## Methods

|                                                                                                                                                                                                                                                                                                                                                                                                             |                                                  |
|-------------------------------------------------------------------------------------------------------------------------------------------------------------------------------------------------------------------------------------------------------------------------------------------------------------------------------------------------------------------------------------------------------------|--------------------------------------------------|
| <p><b>Qualitative approach and research paradigm</b> - Qualitative approach (e.g., ethnography, grounded theory, case study, phenomenology, narrative research) and guiding theory if appropriate; identifying the research paradigm (e.g., postpositivist, constructivist/ interpretivist) is also recommended; rationale**</p>                                                                            | Page 4 (last para) page 5 (1 <sup>st</sup> para) |
| <p><b>Researcher characteristics and reflexivity</b> - Researchers' characteristics that may influence the research, including personal attributes, qualifications/experience, relationship with participants, assumptions, and/or presuppositions; potential or actual interaction between researchers' characteristics and the research questions, approach, methods, results, and/or transferability</p> | Page 5 (3 <sup>rd</sup> para)                    |
| <p><b>Context</b> - Setting/site and salient contextual factors; rationale**</p>                                                                                                                                                                                                                                                                                                                            | Page 4 (3 <sup>rd</sup> para)                    |
| <p><b>Sampling strategy</b> - How and why research participants, documents, or events were selected; criteria for deciding when no further sampling was necessary (e.g., sampling saturation); rationale**</p>                                                                                                                                                                                              | Page 4 (3 <sup>rd</sup> / 4 <sup>th</sup> paras) |
| <p><b>Ethical issues pertaining to human subjects</b> - Documentation of approval by an appropriate ethics review board and participant consent, or explanation for lack thereof; other confidentiality and data security issues</p>                                                                                                                                                                        | Page 12('Ethical review')                        |
| <p><b>Data collection methods</b> - Types of data collected; details of data collection procedures including (as appropriate) start and stop dates of data collection and analysis, iterative process, triangulation of sources/methods, and modification of procedures in response to evolving study findings; rationale**</p>                                                                             | Page 4 (primarily last para)                     |

|    |  |  |
|----|--|--|
| 1  |  |  |
| 2  |  |  |
| 3  |  |  |
| 4  |  |  |
| 5  |  |  |
| 6  |  |  |
| 7  |  |  |
| 8  |  |  |
| 9  |  |  |
| 10 |  |  |
| 11 |  |  |
| 12 |  |  |
| 13 |  |  |
| 14 |  |  |
| 15 |  |  |
| 16 |  |  |
| 17 |  |  |
| 18 |  |  |
| 19 |  |  |
| 20 |  |  |
| 21 |  |  |
| 22 |  |  |
| 23 |  |  |
| 24 |  |  |
| 25 |  |  |
| 26 |  |  |
| 27 |  |  |
| 28 |  |  |
| 29 |  |  |
| 30 |  |  |
| 31 |  |  |
| 32 |  |  |
| 33 |  |  |
| 34 |  |  |
| 35 |  |  |
| 36 |  |  |
| 37 |  |  |
| 38 |  |  |
| 39 |  |  |
| 40 |  |  |
| 41 |  |  |
| 42 |  |  |
| 43 |  |  |
| 44 |  |  |
| 45 |  |  |
| 46 |  |  |
| 47 |  |  |
| 48 |  |  |
| 49 |  |  |
| 50 |  |  |
| 51 |  |  |
| 52 |  |  |
| 53 |  |  |
| 54 |  |  |
| 55 |  |  |
| 56 |  |  |
| 57 |  |  |
| 58 |  |  |
| 59 |  |  |
| 60 |  |  |

|                                                                                                                                                                                                                                                       |                                      |
|-------------------------------------------------------------------------------------------------------------------------------------------------------------------------------------------------------------------------------------------------------|--------------------------------------|
| <b>Data collection instruments and technologies</b> - Description of instruments (e.g., interview guides, questionnaires) and devices (e.g., audio recorders) used for data collection; if/how the instrument(s) changed over the course of the study | Page 4 (last para) Page 16 (table 1) |
| <b>Units of study</b> - Number and relevant characteristics of participants, documents, or events included in the study; level of participation (could be reported in results)                                                                        | Page 4 (4 <sup>th</sup> para)        |
| <b>Data processing</b> - Methods for processing data prior to and during analysis, including transcription, data entry, data management and security, verification of data integrity, data coding, and anonymization/de-identification of excerpts    | Page 4 (last para)                   |
| <b>Data analysis</b> - Process by which inferences, themes, etc., were identified and developed, including the researchers involved in data analysis; usually references a specific paradigm or approach; rationale**                                 | Page 5 (1 <sup>st</sup> para)        |
| <b>Techniques to enhance trustworthiness</b> - Techniques to enhance trustworthiness and credibility of data analysis (e.g., member checking, audit trail, triangulation); rationale**                                                                | Page 5 (2 <sup>nd</sup> para)        |

## Results/findings

|                                                                                                                                                                                                   |                    |
|---------------------------------------------------------------------------------------------------------------------------------------------------------------------------------------------------|--------------------|
| <b>Synthesis and interpretation</b> - Main findings (e.g., interpretations, inferences, and themes); might include development of a theory or model, or integration with prior research or theory | Pages 5 to page 10 |
| <b>Links to empirical data</b> - Evidence (e.g., quotes, field notes, text excerpts, photographs) to substantiate analytic findings                                                               | As above           |

## Discussion

|                                                                                                                                                                                                                                                                                                                                                                                                             |                |
|-------------------------------------------------------------------------------------------------------------------------------------------------------------------------------------------------------------------------------------------------------------------------------------------------------------------------------------------------------------------------------------------------------------|----------------|
| <b>Integration with prior work, implications, transferability, and contribution(s) to the field</b> - Short summary of main findings; explanation of how findings and conclusions connect to, support, elaborate on, or challenge conclusions of earlier scholarship; discussion of scope of application/generalizability; identification of unique contribution(s) to scholarship in a discipline or field | Pages 10 to 11 |
| <b>Limitations</b> - Trustworthiness and limitations of findings                                                                                                                                                                                                                                                                                                                                            | Page 2         |

## Other

|                                                                                                                                               |                               |
|-----------------------------------------------------------------------------------------------------------------------------------------------|-------------------------------|
| <b>Conflicts of interest</b> - Potential sources of influence or perceived influence on study conduct and conclusions; how these were managed | None (page 12)                |
| <b>Funding</b> - Sources of funding and other support; role of funders in data collection, interpretation, and reporting                      | Funder Acknowledged (page 12) |

\*The authors created the SRQR by searching the literature to identify guidelines, reporting standards, and critical appraisal criteria for qualitative research; reviewing the reference lists of retrieved sources; and contacting experts to gain feedback. The SRQR aims to improve the transparency of all aspects of qualitative research by providing clear standards for reporting qualitative research.

1  
2  
3  
4  
5  
6  
7  
8  
9  
10  
11  
12  
13  
14  
15  
16  
17  
18  
19  
20  
21  
22  
23  
24  
25  
26  
27  
28  
29  
30  
31  
32  
33  
34  
35  
36  
37  
38  
39  
40  
41  
42  
43  
44  
45  
46  
47  
48  
49  
50  
51  
52  
53  
54  
55  
56  
57  
58  
59  
60

\*\*The rationale should briefly discuss the justification for choosing that theory, approach, method, or technique rather than other options available, the assumptions and limitations implicit in those choices, and how those choices influence study conclusions and transferability. As appropriate, the rationale for several items might be discussed together.

**Reference:**

O'Brien BC, Harris IB, Beckman TJ, Reed DA, Cook DA. **Standards for reporting qualitative research: a synthesis of recommendations.** *Academic Medicine*, Vol. 89, No. 9 / Sept 2014  
DOI: 10.1097/ACM.0000000000000388

For peer review only
